1 **Mesenchymal stem cells (MSCs) offer a drug tolerant and immune-**  
2 **privileged niche to *Mycobacterium tuberculosis***

3  
4  
5  
6 Neharika Jain<sup>1</sup>, Haroon Kalam<sup>1</sup>, Lakshyaveer Singh<sup>1</sup>, Vartika Sharma<sup>1</sup>, Saurabh  
7 Kedia<sup>2</sup>, Prasenjit Das<sup>3</sup>, Vineet Ahuja<sup>2</sup> and Dhiraj Kumar<sup>1\*</sup>

8  
9  
10  
11 <sup>1</sup>Cellular Immunology Group  
12 International Centre for Genetic Engineering and Biotechnology  
13 Aruna Asaf Ali Marg  
14 New Delhi-110067  
15 INDIA

16  
17 <sup>2</sup>Department of Gastroenterology and <sup>3</sup>Department of Pathology,  
18 All India Institute of Medical Sciences  
19 New Delhi-110012  
20 INDIA

21  
22 Running title: MSCs as pro-bacterial niche to *Mycobacterium tuberculosis*

23 \*Correspondence: [dhiraj@icgeb.res.in](mailto:dhiraj@icgeb.res.in)

24  
25  
26  
27  
28

## 29 **Summary**

30 Anti-tuberculosis (TB) drugs while being highly potent *in vitro* require prolonged  
31 treatment to control *Mycobacterium tuberculosis* (*Mtb*) infections *in vivo*. We report  
32 here, mesenchymal stem cells (MSCs) shelter *Mtb* to help tolerate anti-TB drugs.  
33 MSCs uptake *Mtb* readily and allow them grow unabated despite having functional  
34 innate pathway of phagosome maturation. Unlike macrophage-resident ones, MSC-  
35 resident *Mtb* tolerates anti-TB drugs remarkably well, a phenomenon requiring  
36 proteins ABCC1, ABCG2 and vacuolar-type H<sup>+</sup>ATPases. Additionally, contrary to  
37 what is classically known, IFN $\gamma$  and TNF $\alpha$  aid mycobacterial growth within MSCs.  
38 Mechanistically, evading drugs and inflammatory cytokines by MSC-resident *Mtb* is  
39 dependent on elevated PGE2 signaling, which we subsequently verified *in vivo*  
40 analyzing sorted CD45<sup>-</sup>CD73<sup>+</sup>SCA1<sup>+</sup>-MSCs from the lungs of infected mice.  
41 Moreover granulomas from human pulmonary and extra-pulmonary TB show  
42 presence of MSCs co-inhabiting with *Mtb*. Together the results show targeting the  
43 immune-privileged niche, provided by MSCs to *Mtb*, can revolutionize tuberculosis  
44 prevention and cure.

## 45 **Introduction**

46 *Mycobacterium tuberculosis* (*Mtb*) continues to infect, cause illness (tuberculosis) and  
47 kill large number of individuals globally. Among numerous factors that thwart any  
48 tuberculosis control program, lack of an effective vaccine and long duration of  
49 treatment are the two most critical ones<sup>1,2</sup>. Long treatment duration is majorly  
50 attributed behind non-compliance and emergence of drug-resistant tuberculosis  
51 including multi- and extensively drug-resistant (MDR and XDRs respectively) ones<sup>1</sup>.  
52 While standard-of-care anti-TB drugs are very efficient in killing *Mtb* in liquid culture  
53 and during *ex vivo* infection studies in macrophages, their efficacy is dramatically  
54 compromised during *in vivo* infection studies and in the clinical practices, requiring  
55 prolonged treatment duration<sup>3</sup>. It is believed that *Mtb* undergoes metabolic  
56 adaptations within host granulomas, which render these bacteria less vulnerable to the  
57 standard drugs<sup>4,5</sup>. Driving factors, which cause such adaptations include nitric oxide  
58 (NO), redox stress (ROS), low oxygen (hypoxia), low nutrients or altered carbon  
59 source<sup>4,6-11</sup>.

60 Curiously, whatever we know about the intracellular lifestyle of mycobacteria in the  
61 hosts is mostly through studies on macrophages<sup>12,13</sup>. Are there additional niches of  
62 mycobacteria *in vivo*, which could facilitate the perceived metabolic adaptations?  
63 While there is no clear answer to the above assumption, there are certainly different  
64 other cell types which get infected inside the host including lung epithelial cells,  
65 macrophages, neutrophils, dendritic cells, adipocytes and mesenchymal stem cells  
66 (MSCs)<sup>14-18</sup>. MSCs are peculiar among these cells since they were first reported to  
67 dampen the host immunity against tuberculosis around the granulomas<sup>19</sup>.  
68 Subsequently it was observed that these cells are the site of persistent or latent  
69 bacterial infection<sup>20</sup>. Interestingly, latent bacteria are perceived to be more tolerant to

70 anti-TB drugs<sup>21-23</sup>. Moreover, MSCs are classically known for their immune-  
71 modulatory functions<sup>24-26</sup>. Whether MSCs provide a privileged niche to mycobacteria  
72 allowing them to withstand drug and evade host immunity remains unclear. Potential  
73 benefits mycobacteria enjoys within these cells continue to remain obscure due to  
74 lack of systematic studies on the intracellular lifestyle of *Mtb* within MSCs. In this  
75 study, using adipose tissue-derived mesenchymal stem cells (ADSCs), we show that  
76 *Mtb* not only escapes the effect of anti-TB drugs while residing within ADSCs but  
77 also effectively evade host immune mediators. We further establish the mechanism  
78 behind these unusual properties of ADSCs and show their relevance during *in vivo*  
79 infection in mice as well as studies on the human subjects.



## 80 **Results**

### 81 **Adipose-derived Mesenchymal stem cells (ADSCs) support mycobacterial** 82 **growth**

83 Human primary adipose-derived mesenchymal stem cells obtained commercially  
84 were first characterized for expression of cell-surface markers like CD73 and CD271  
85 as well as their ability to differentiate into three different lineages i.e. adipocytes,  
86 chondrocytes and osteocytes (Fig. S1A and S1B). We infected ADSCs with *GFP-*  
87 *H37Rv* (MOI 1:10) with ~80 percent efficiency (Fig. 1A). Mean fluorescence  
88 intensity (MFI) measurements at 6 days post-infection showed that *Mtb* within  
89 ADSCs multiplied well (Fig. 1B), which we also confirmed by colony forming unit  
90 (CFU) counts upon plating the bacteria released by lysing the infected ADSCs (Fig.  
91 1C). A time-course growth analysis using CFU counts showed massive increase in  
92 *Mtb* CFU at 9 and 12 days post-infection (Fig. 1C), which however was not the case  
93 with the vaccine strain BCG that showed marked decline in survival within ADSCs  
94 by 3 days post-infection (Fig. 1D). While *H37Rv* survived well in human primary  
95 macrophages (Fig. 1E) and within THP-1 derived macrophages (Fig. 1F), consistent  
96 with previous reports from several groups including ours<sup>27-29</sup>, its multiplication  
97 within macrophages was markedly subdued when compared with that observed within  
98 ADSCs (Fig. 1). Infection with *H37Rv* did not result in spontaneous differentiation of  
99 ADSCs to any of the three lineages mentioned above (Fig. S1C). A microarray  
100 analysis of ADSCs infected with *H37Rv* for 6 days also did not reveal any significant  
101 change in expression of genes involved in differentiation into adipocyte, chondrocyte  
102 or osteocyte (Fig. S1D-E and Table S1). Microarray analysis showed significant  
103 regulation of genes belonging to usual functional classes like immune regulation,

104 inflammation, response to stress, transport pathways and cholesterol metabolism etc.  
105 (Fig S1F).

### 106 **ADSC resident *Mycobacterium tuberculosis* shows drug tolerant phenotype**

107 Since MSCs were reported to serve as a site for bacterial persistence<sup>20</sup> we were keen  
108 to understand how *Mtb* residing within these cells responds to anti-TB drugs. We  
109 treated *Mtb*-infected ADSCs with different doses of isoniazid (INH) or rifampicin  
110 (RIF) for 24 hours before harvesting the cells and CFU plating on 9th day post-  
111 infection. Even at doses as high as 5µg/ml for INH, ~10% of *Mtb* tolerated the drug  
112 (Fig. 1G). The percent tolerant population was more than 15% at 0.5 µg/ml as well as  
113 at 1 µg/ml of INH (Fig. 1G). In case of RIF, nearly 50% of bacteria were tolerant to  
114 the drug at 0.1 µg/ml, which did not go down below 15% even at doses as high as  
115 5µg/ml (Fig. 1G). Interestingly, drug tolerant phenotype of ADSC-resident *Mtb* was  
116 independent of time spent within ADSCs as drug (INH or RIF) tolerant *H37Rv* were  
117 observed as early as 3 days post-infection and maintained at 6, 9 and 12 days post-  
118 infection (Fig. 1H and 1I). At similar doses and for similar duration of treatment (i.e.  
119 24 hours) within macrophages, there were hardly any surviving bacteria in case of  
120 INH (~2-4%) while there were nearly 10-15% tolerant bacteria in case of RIF (Fig.  
121 1H and 1I). Thus it was evident that ADSCs provide an environment, which allowed  
122 *Mtb* to tolerate anti-TB drugs.

### 123 **Host ABC transporters ABCC1 and ABCG2 play key role in bacterial drug** 124 **tolerance**

125 MSCs are known to express high level of ABC family transporters or efflux pumps,  
126 which are often attributed to drug tolerance in case of cancer<sup>30,31</sup>. In our microarray  
127 data we did observe slight but consistent change in the expression of several of the  
128 ABC transporters including ABCC1 and ABCG2, which are also known as MRP1

129 and BCRP respectively <sup>32,33</sup> (Table S1). In fact, ADSCs showed increase in  
130 expression of ABCC1 and ABCG2 upon *Mtb* infection in MOI dependent manner  
131 (Fig S2A). Both intracellular as well as surface expression of ABCC1 and ABCG2  
132 were higher in H37Rv infected ADSCs with respect to the control cells (Fig. 1J). To  
133 test whether ABCC1 and ABCG2 were involved in imparting drug tolerance, we used  
134 known pharmacological inhibitors against them. Treatment with novobiocin (an  
135 ABCG2 inhibitor) or with MK571 (ABCC1 inhibitor) led to a decline in the drug  
136 tolerant *Mtb* population (Fig. S2B-C). Novobiocin however is also a well-known  
137 DNA gyrase inhibitor and it could actually kill *Mtb* even *in vitro* in liquid cultures  
138 (Fig S2D). Unlike novobiocin, MK571 treatment did not have any effect on *Mtb*  
139 growth *in vitro* (Fig. S2E). Since pharmacological inhibitors may still have off-target  
140 effects, we knocked down these transporters using specific siRNAs. Knocking down  
141 either ABCC1 or ABCG2 led to a substantial decline in the drug-tolerant bacterial  
142 population within ADSCs (Fig. 1K and Fig. S2F). When ABCC1 and ABCG2 both  
143 were knocked down simultaneously, the tolerant bacterial population was almost  
144 wiped out reaching nearly 2-4 % (Fig. 1K). There was no such effect on drug-tolerant  
145 population when scrambled siRNA were used (Fig. 1K). While the results with  
146 tolerant population did indicate the role of ABCC1 and ABCG2 in *Mtb* drug tolerance  
147 within ADSCs, in parallel experimental groups where no drug was used, knocking  
148 down ABCC1 and ABCG2 led to a considerable increase in bacterial CFU (Fig. 1L).  
149 The increase in bacterial CFU was higher when both ABCC1 and ABCG2 were  
150 simultaneously knocked down whereas there was no effect when scrambled siRNA  
151 was used as control (Fig. 1L). Similar results were also obtained when ABCC1 or  
152 ABCG2 were inhibited by corresponding pharmacological inhibitors (Fig. S2G-H).

### 153 **Role of lysosomal function in mycobacterial drug tolerance in ADSCs**

154 While ABCC1 and ABCG2 seemed important for drug tolerance, their role in  
155 bacterial killing as evident in figure 1L was surprising. Curiously, the role of ABCC1  
156 and ABCG2 seemed more to do with the lysosomal function rather than actual efflux  
157 activity at the cell surface since inhibition of vacuolar type H<sup>+</sup> ATPases by  
158 bafilomycin A1 (BafA1) also completely wiped out drug tolerant *Mtb* within ADSCs  
159 (Fig. 2A). Another lysosomal acidification inhibitor chloroquine (CQ) had similar  
160 effect (Fig. 2A). However conditions, which led to increased lysosomal maturation  
161 like rapamycin treatment showed drug tolerant population at par with the control  
162 ADSCs (Fig 2A). Since rapamycin is a well-known inducer of autophagy<sup>34</sup>, we also  
163 verified it using autophagy inhibitor 3-methyladenine (3MA), which expectedly led to  
164 a decline in the drug tolerant population (Fig. 2A). Thus lysosomal function was  
165 probably important to achieve drug tolerant phenotype within ADSCs. Interestingly,  
166 in the absence of INH, conditions, which resulted in reducing the drug tolerant  
167 population, helped bacterial survival. Thus, BafA1, 3MA and CQ treatment resulted  
168 in increased bacterial CFU whereas rapamycin treatment led to a decline in the CFU  
169 suggesting role of lysosomal killing mechanism in MSCs (Fig. 2B). Before further  
170 exploring into the mechanism of drug tolerance within ADSCs, we wanted to  
171 compare this phenomenon with the reported instances of drug tolerance in  
172 macrophages<sup>35</sup>.

### 173 **Effect of inflammatory cytokines IFN $\gamma$ and TNF $\alpha$ on drug tolerance within** 174 **ADSCs**

175 In macrophages, activation with inflammatory cytokines is known to induce drug  
176 tolerant phenotype of *Mtb*<sup>35</sup>. We reconfirmed, in THP-1 macrophages, treatment with  
177 IFN $\gamma$  or TNF $\alpha$  led to a substantial increase in drug tolerant population from ~3-4% in  
178 control to 30-40% in the activated cells (Fig. 2C). At similar doses of these cytokines,

179 in the absence of drug, nearly 50% of the bacteria got killed, in agreement with the  
180 anti-bacterial state these cytokines impart to the activated macrophages<sup>35</sup>. In ADSCs,  
181 IFN $\gamma$  treatment at 100, 250 and 500 units/ml led to almost dose dependent increase in  
182 the INH tolerant population (Fig. 2E). In case of TNF $\alpha$  treatment, INH tolerant *Mtb*  
183 population was higher at 10 and 20 ng/ml, which came down to almost control levels  
184 at 50ng/ml (Fig. 2E). TNF $\alpha$  at 20 ng/ml was much more potent in inducing drug  
185 tolerance than IFN $\gamma$  at any doses studied. More startling observation however was the  
186 case where *Mtb*-infected ADSCs were treated with these cytokines in the absence of  
187 drugs. There was nearly dose dependent increase in bacterial CFU upon treatment of  
188 *Mtb*-infected ADSCs with IFN $\gamma$  or TNF $\alpha$  (Fig. 2F). The pro-bacterial effect of IFN $\gamma$   
189 and TNF $\alpha$  on *Mtb*-infected ADSCs was specific to the stimulus and corresponding  
190 downstream signaling since upon neutralization with purified IFN $\gamma$ R1 or with anti-  
191 TNF $\alpha$  antibody, we could revert the pro-bacterial effect of IFN $\gamma$  or TNF $\alpha$  stimulation  
192 on bacterial CFU (Fig. 2G). Expectedly, with the similar neutralization study in THP-  
193 1-derived macrophages, there was rescue of *Mtb* from cytokine-mediated killing (Fig.  
194 2H). Thus *Mtb*-infected macrophages and MSCs respond in contrasting manner to  
195 IFN $\gamma$  and TNF $\alpha$  stimulus.

#### 196 **Analysis of intracellular niches of *Mtb* shows classic phagosome maturation** 197 **dynamics in ADSCs**

198 Results from conditions like ABCC1 or ABCG2 knockdown, BafA1 treatment or  
199 IFN $\gamma$  or TNF $\alpha$  treatments, all of which led to increase in bacterial survival suggest  
200 that ADSCs, despite supporting robust growth of the bacteria, keep actively killing  
201 the bacilli. To check whether phagosome maturation pathways as observed in  
202 macrophages are operational in similar fashion during *Mtb* infection in ADSCs, we  
203 assayed for *Mtb* co-localization with early phagosomes (RAB5), late phagosomes

204 (RAB7), lysosomes (LAMP1) and acidified lysosomes (LAMP1 and LysoTracker).  
205 At any given time post-infection, a large number of bacteria (~40-50%) stayed within  
206 RAB5 positive early phagosomes inside the ADSCs (Fig. S3A). While only 2-5%  
207 bacteria were ever present in RAB7 positive late phagosomes (Fig. S3B). Similar  
208 distribution of *Mtb* is also reported within macrophages as reported by others and also  
209 confirmed by us <sup>36</sup> (Fig. S3C). This reflects the phagosome maturation arrest inflicted  
210 by *Mtb* in the infected macrophages <sup>36,37</sup>. However unlike macrophages where  
211 LAMP1-*Mtb* or LysoTracker-*Mtb* co-localization rarely crosses ~15% <sup>27</sup>, there are  
212 more bacteria (~30-40%) present in LAMP1 or LysoTracker-LAMP1 double positive  
213 compartments in ADSCs (Fig. 2I-J, S3D). The matured lysosomes, i.e. LAMP1  
214 positive acidified compartments indeed reflect the killing mechanism in ADSCs since  
215 ~80% of intracellular BCG, the strain that gets killed within ADSCs, are present in  
216 LysoTracker-LAMP1 double positive compartments (Fig. 2K). Interestingly, treatment  
217 with IFN $\gamma$ , TNF $\alpha$  or MK571 in general led to a decline in bacterial localization to  
218 LysoTracker or LAMP1+LysoTracker compartments however LAMP1 compartment  
219 alone showed only marginal decline (Fig. 2J, S3D). Exclusion of Cathepsin D, the  
220 lysosomal protease, from LAMP1-LysoTracker positive compartment strongly  
221 correlated with increased bacterial survival upon IFN $\gamma$  or MK571 treated cells (Fig.  
222 2L, S3D). Interestingly, ABCC1 and ABCG2 were also found to co-localize with *Mtb*  
223 suggesting their recruitment to phagosomes (Fig. S3E). At least in case of TNF $\alpha$   
224 treatment, exclusion of ABCC1 from the LAMP1-LysoTracker compartment was  
225 highly significant whereas IFN $\gamma$  or MK571 treatment showed only marginal decline  
226 (Fig. 2M) leaving an impression that ABCC1 is probably directly involved in  
227 bacterial killing. However their direct role in *Mtb* killing is supported by only one set  
228 of evidences- increased bacterial survival upon their knockdown or inhibition. The

229 strong correlation between bacterial killing and their co-localization to LAMP1-  
230 Lysotracker-CatD compartment nonetheless suggest active role of classic phagosome  
231 maturation pathways in bacterial killing with ADSCs.  
232 Interestingly, in contrast to what is known in macrophages<sup>27</sup>, *Mtb* very rarely co-  
233 localized to autophagosomes and xenophagy flux was completely absent in ADSCs  
234 (Fig S4A), suggesting little role if any, of autophagy in controlling *Mtb* within  
235 ADSCs. Curiously, ADSCs showed very high basal autophagy flux (Fig. S4B), which  
236 presumably is critical for maintaining the stem cell like property of these cells,  
237 highlighting the segregation of homeostatic and anti-bacterial arms of autophagy as  
238 reported by us earlier<sup>38</sup>. Moreover treatment with IFN $\gamma$  led to increased autophagy  
239 flux in ADSCs, unlike what was reported previously for macrophages (Fig. S4C)<sup>39</sup>.  
240 Unlike macrophages, IFN $\gamma$  treatment had no effect on cellular ROS generation in  
241 ADSCs (Fig. S4D). To some extent, this could explain why IFN $\gamma$  failed to induce  
242 killing of *Mtb* within ADSCs.

### 243 **The lipid mediator PGE2 helps MSCs exhibit pro-bacterial attributes**

244 Results so far establish that mesenchymal stem cells are uncharacteristically pro-  
245 bacterial in nature, at least during mycobacterial infections, helping them evade anti-  
246 TB drugs as well as classic host immune mediators like IFN $\gamma$  and TNF $\alpha$ . However,  
247 there still was no clue on how MSCs execute these behaviors. To understand the  
248 mechanistic basis of the observed results, we went back to our microarray data to  
249 identify genes showing significant regulation upon *Mtb* infection in ADSCs. The anti-  
250 inflammatory as well as immune-modulatory functions of MSCs are well known,  
251 however in all such known cases, MSCs execute its role by modulating functions of  
252 other cells, including T cells and macrophages<sup>40-42</sup>. Some of the key mediators that  
253 help MSCs execute these functions are PGE2, IDO1, IL6, CCL2, VEGFC, LIF etc.

254 <sup>24,42-46</sup>. In our microarray data, genes from the PGE pathway like PTGS2, PTGES and  
255 PTGR2 showed nearly 8, 4 and 4 folds (log<sub>2</sub>) increase in expression respectively (Fig.  
256 S5A). Similarly IDO1 showed 6 folds increase, whereas LIF, IL6, CCL2 and VEGF  
257 each showed more than 3 fold increase in expression post-infection (Fig. S5A). We  
258 first tested PGE2 levels in the culture supernatants of ADSCs that were infected with  
259 *H37Rv*. Consistent with the microarray data PGE2 ELISA confirmed increased  
260 synthesis and secretion of PGE2 from *Mtb*-infected ADSCs (Fig. 3A). Interestingly,  
261 treatment with IFN $\gamma$  or TNF $\alpha$  further increased PGE2 levels in the culture  
262 supernatants whereas MK571 treated cells showed almost similar level of PGE2 as  
263 infected control cells (Fig. 3A). We used celecoxib, a widely used PTGS2 (or COX2)  
264 inhibitor, which is also an FDA approved drug in the market, as a negative control.  
265 *Mtb*-infected ADSCs treated with celecoxib showed negligible PGE2 levels by  
266 ELISA (Fig. 3A). Next we treated *Mtb*-infected ADSCs with celecoxib at 50, 150 and  
267 250 $\mu$ M concentrations under all the conditions tested so far in this study. Treatment  
268 with celecoxib reduced *Mtb* CFU in a dose dependent manner across the conditions  
269 including infection alone or when treated with IFN $\gamma$ , TNF $\alpha$  or MK571 (Fig. 3B).  
270 Similar results were also obtained with EP2 receptor (receptor for PGE2) antagonist  
271 PF04418948, suggesting involvement of signaling through PGE2 pathway in bacterial  
272 survival (Fig. S5B). Celecoxib was also effective in killing *Mtb* within macrophages  
273 however not as dramatically as observed in MSCs (Fig. S5C). Unlike ADSCs, there  
274 was no increase in PGE2 release by THP-1 macrophages upon infection or treatment  
275 with IFN $\gamma$  or TNF $\alpha$  (Fig. S5D). We also verified these results by knocking down  
276 PTGS2 (COX2) using specific siRNAs (Fig. 3C and S5E). Confocal microscopy  
277 revealed that majority of bacteria in celecoxib treated cells or PF04418948 treated  
278 cells or COX2 siRNA treated cells co-localized with LAMP-1, LysoTracker as well as



279 CatD (Fig. 3D and S5F). Interestingly, COX2 inhibition by celecoxib also helped  
280 limit the drug tolerant phenotype in ADSCs against INH, irrespective of treatment  
281 with IFN $\gamma$  or TNF $\alpha$  (Fig. 3E). Moreover, MK571, which itself decreases drug-tolerant  
282 *Mtb* in ADSCs when combined with celecoxib treatment further decreases the drug-  
283 tolerant population of *Mtb* within ADSCs (Fig 3E). The effect of celecoxib on  
284 bacterial drug tolerance was PGE2-mediated and not due to possible role of certain  
285 COX2 inhibitors directly on bacterial drug-resistance protein MDR1<sup>47</sup> since  
286 knocking down COX-2 also led to a remarkable decline in INH-tolerant as well as  
287 rifampicin-tolerant *Mtb* population within ADSCs (Fig. 3F and 3G respectively).  
288 Efficacy of COX2 knockdown by siRNA on bacterial drug tolerance also rule out role  
289 of PGE2 inhibitors in directly regulating the efflux proteins as reported previously<sup>48</sup>.

290 **MSCs serve as a niche for *Mtb* during *in vivo* infection allowing drug tolerance in**  
291 **PGE2 dependent manner**

292 While all the results so far were performed on human primary adipose tissue-derived  
293 mesenchymal stem cells, we next wanted to explore whether these cells actually get  
294 involved during *in vivo* infection in mice and humans as well as to know whether  
295 PGE2 signaling plays similar role *in vivo*. We infected C57BL/6 mice with *H37Rv*  
296 through aerosol challenge and 4 weeks post-infection, these animals were divided into  
297 four groups: control, celecoxib (50mg/kg), INH (10mg/kg) or INH+celecoxib; and  
298 treated for subsequent 4 and 8 weeks. From the initial bacterial load of 100-150 per  
299 animal, it reached around 10<sup>6</sup> per animal by end of 4 weeks, 2x10<sup>6</sup> by the end of eight  
300 weeks and 3x10<sup>6</sup> by the end of 12 weeks in the lungs (Fig 4A). While celecoxib  
301 treatment alone significantly reduced bacterial CFU after 4 weeks of treatment, the  
302 effects were not visible at 8 weeks post-treatment (Fig. 4A). INH treatment brought  
303 the bacterial CFU significantly down at both 4 and 8 weeks post-treatment (Fig. 4A).

304 Animals, which received both celecoxib and INH showed more significant reduction  
305 in bacterial CFU in the lungs at both 4 and 8 weeks post-treatment (Fig. 4A). Similar  
306 results were also obtained in the spleen (Fig. 4B). The combination treatment was  
307 significantly more effective with respect to INH or celecoxib alone in controlling  
308 bacterial load in spleen at 12 weeks (Fig. 4B).

309 We next sorted lung tissues from the infected animals at each time points and  
310 treatment groups into CD45<sup>-</sup>CD73<sup>+</sup>Sca1<sup>+</sup> (MSCs) and CD45<sup>+</sup>CD11B<sup>+</sup>Ly6G<sup>-</sup>  
311 (macrophages) cells with a purity of more than 90% (Fig. 4C and S5G). Population of  
312 macrophages increased dramatically from week 4 to week 8, across all treatment  
313 groups and declined subsequently at 12 weeks (Fig. 4D). Population of MSCs was  
314 highest at 4 weeks post-infection, which declined rapidly at 8 and 12 weeks post-  
315 infection (Fig. 2E). Lysing and plating these sorted cells on 7H11 media showed  
316 presence of *Mtb* in both macrophages and MSCs (Fig. 4F-G). Number of bacilli in  
317 both cells progressively increased from week 4 to week 12, shown as number of  
318 bacilli per ten thousand cells (Fig. 4F and 4G). The macrophage-resident *Mtb* were  
319 not affected by celecoxib, INH or both at 4 weeks post- treatment, largely due to low  
320 dose of INH used in this study. Moreover, *in vivo* macrophages are also expected to  
321 have activated phenotype, thereby could develop drug tolerance as reported  
322 previously<sup>35</sup>. At 8 weeks post-treatment, each of these treatments resulted in  
323 significant decline in macrophage-resident *Mtb* population (Fig. 4F). Interestingly,  
324 MSC-resident *Mtb* could be killed by INH or celecoxib alone or in combination even  
325 at 4 weeks post-treatment (Fig. 4G). However, consistent with the *ex vivo* results,  
326 effect of INH alone on MSC-resident *Mtb* was relatively less in magnitude with  
327 respect to celecoxib alone or celecoxib+INH treated animals (Fig. 4G). At 8 weeks of  
328 treatment, INH and celecoxib were equally effective on MSC-resident *Mtb*, while the

329 combined treatment resulted in additive effect and showed further decline in *Mtb*  
330 CFU (Fig. 4G).

331 **MSCs are present in human pulmonary and extra-pulmonary tuberculosis**  
332 **granulomas**

333 The results so far establish that MSCs serve as a niche for *Mtb* providing drug and  
334 immune privileged niche, in PGE2 dependent manner both *ex vivo* and *in vivo in*  
335 animals. We next analyzed presence and spatial localization of CD73<sup>+</sup> cells with  
336 respect to *Mtb* in tissue sections from pulmonary and extra-pulmonary TB lesions  
337 from human subjects. CD73<sup>+</sup> cells were found across different pulmonary and extra-  
338 pulmonary tuberculosis lesions like gut and lymph nodes (Fig. 4H-I). Intestinal biopsy  
339 samples were taken from granuloma-positive confirmed intestinal tuberculosis  
340 patients<sup>49</sup>. In lung and lymph node biopsies where in addition to CD73, Ag85B of  
341 *Mtb* was also stained, presence of these cells in the close vicinity of *Mtb* was apparent  
342 (Fig. 4I).

## 343 **Discussions**

344 Almost everything that we know about the intracellular lifestyle of *Mtb* largely  
345 emerged through studies on monocyte/macrophage models. The host responses and  
346 mechanism of immune evasions are also studied keeping in mind macrophages as the  
347 primary cells where the bacteria reside <sup>12,13</sup>. The present study was undertaken to  
348 understand how mesenchymal stem cells (MSCs) could facilitate mycobacterial  
349 persistence in the host as reported by others <sup>20</sup>. This required us to explore the  
350 intracellular lifestyle of *Mtb* within MSCs, not much is known about it. The immune-  
351 modulatory properties of MSCs are well known including during *Mtb* infection <sup>19</sup>.  
352 However, in majority of cases, the immune-modulatory effects of MSCs are studied  
353 in trans i.e. on a different cell type, which is mediated by effectors released from  
354 MSCs <sup>40-42</sup>. Whether the innate ability of MSCs play a role in mycobacterial  
355 persistence and if these cells exhibit any cell-autonomous immune-modulatory  
356 properties, is not known. Interestingly, only virulent strain H37Rv could survive and  
357 divide well within ADSCs while BCG got killed, suggesting presence of active innate  
358 defense mechanism in these cells. One critical aspect of mycobacterial persistence is  
359 tolerance to anti-TB drugs, which is driven by host environment like macrophage  
360 residence, macrophage activation, low oxygen within granulomas, NO etc. <sup>35,50</sup>. Our  
361 finding that MSC-resident *Mtb* was tolerant to anti-TB drugs underscores the  
362 physiological advantage that these cells possess in order to harbor persistent infection  
363 as reported previously <sup>20</sup>. Since adult stem cells are known to have high efflux activity  
364 via ABC transporters, which helps in drug tolerance in cases like cancer <sup>51,52</sup> we  
365 questioned whether these efflux proteins could also help throwing out anti-TB drugs,  
366 thereby helping in drug-tolerance. Our results indeed show increased expression and  
367 involvement of ABCC1 and ABCG2, in drug tolerance, both of which acted

368 independently since their combined effects were greater than individual effects.  
369 However, inhibition of vacuolar-type H<sup>+</sup>ATPase by BafA1 led to a more dramatic  
370 decline in drug-tolerant population, suggesting phago-lysosomal environment to be  
371 the key factor behind drug-tolerance. Moreover, increase in bacterial CFU upon  
372 ABCC1 or ABCG2 inhibition/knockdown in the absence of INH indicated function of  
373 these proteins other than cellular efflux of drugs. Their recruitment to bacterial  
374 phagosomes indeed point to such a possibility especially since their recruitment to the  
375 phagosomes largely correlated with bacterial killing. ABC proteins are known to have  
376 several moonlighting functions including nuclear translocation, redox balance and  
377 antigen presentation<sup>53-56</sup>. Results suggest, at least in MSCs, they are also involved in  
378 bacterial killing in the phago-lysosomal system. Whether it is associated with  
379 lysosomal acidification or transport of bactericidal effectors remains to be uncovered.  
380 It is however possible that ABC proteins are actively excluded from getting recruited  
381 to *Mtb* phagosomes while being present on other endo-lysosomal vesicles, where  
382 through their inwardly transport activities sequester certain anti-bacterial effectors  
383 including anti-TB drugs, away from mycobacterial phagosomes in isolated vesicles.  
384 This could potentially explain why knocking down or inhibition of ABCC1 or  
385 ABCG2 helps increased bacterial survival. At present we have no evidence to support  
386 whether these effectors could be H<sup>+</sup> ions, oxidized glutathione or glutathione metal  
387 adducts, ubiquitin-derived peptides and other anti-microbial peptides; each of which  
388 are capable of killing the bacteria and are also known targets of ABC proteins-  
389 mediated transport across biological membrane<sup>53,57</sup>.  
390 Mycobacterial drug tolerance can also be induced *in vitro* or *ex vivo* in macrophages.  
391 *In vitro*, *Mtb* develops drug tolerance under stress conditions like hypoxia, NO,  
392 nutrient stress etc.<sup>7,58</sup>. There are also reports, which suggest mere macrophage

393 residence for few hours is sufficient to induce drug tolerance in *Mtb*<sup>50</sup>. Yet another  
394 study reported increased bacterial drug tolerance in activated macrophages<sup>35</sup>. The  
395 common thread across these studies is that when *Mtb* witnesses stress whether *in vitro*  
396 or *in vivo*, it activates a set of genes which inadvertently also helps them tide-over the  
397 effect of drugs<sup>11,35</sup>. In agreement with the activated macrophage studies, we noted  
398 further increase in drug tolerance of MSC-resident *Mtb* when activated by  
399 inflammatory cytokines like IFN $\gamma$  and TNF $\alpha$ . Most surprisingly though, in the  
400 absence of drugs, IFN $\gamma$  or TNF $\alpha$  treatment did not kill the bacteria, rather helped them  
401 grow better. To our knowledge, this is the first report, where under any circumstance  
402 a pro-bacterial role for these classic pro-inflammatory cytokines is reported. However  
403 MSCs are known to show enhanced immune-modulatory properties when activated  
404 with inflammatory cytokines like IFN $\gamma$ , TNF $\alpha$  and even IL1 $\beta$ <sup>59,60</sup>. Some key anti-  
405 bacterial phenotypes activated in macrophages upon IFN $\gamma$  stimulation include  
406 increased cellular ROS production, mitochondrial depolarization, autophagy  
407 inhibition etc.<sup>39,61</sup>. In MSCs, IFN $\gamma$  treatment had no such effect and there was  
408 significant increase in autophagy. Interestingly, unlike in macrophages, *Mtb* present in  
409 MSCs are not present in autophagosomes and therefore xenophagy flux is completely  
410 absent<sup>27,38</sup>. This partially explains the loss of anti-bacterial effects of IFN $\gamma$  in ADSCs,  
411 although does not explain increased bacterial survival upon inflammatory stimuli.  
412 However similar to what we noted about ABCC1 or ABCG2 inhibition; pro-bacterial  
413 effects of IFN $\gamma$  and TNF $\alpha$  had mostly to do with lysosomal killing. Since each of  
414 these treatments were for the final 24 hours before CFU plating were done, it cannot  
415 reflect increased bacterial replication rather show diminished bacterial killing. This  
416 observation however brings an exceptionally worrisome insight on the problem of  
417 poor efficacy of every vaccine candidates tested so far. While there are several

418 vaccine candidates at different stages of development against tuberculosis to replace  
419 or enhance BCG, the only commercially available vaccine, a closer look at each of the  
420 vaccine candidate shows that immunological parameters considered as the correlates  
421 of protection is common across them<sup>62</sup>. Thus, whether it is MTBVAC or TB/FLU-  
422 04L, Ad5Ag85A, MVA85A or others, they all rely on generating strong IFN $\gamma$   
423 producing CD4<sup>+</sup> and/or CD8<sup>+</sup> T cells<sup>63-65</sup>. However given the unconventional pro-  
424 bacterial effects of IFN $\gamma$  on MSCs, these vaccines can only generate an immune  
425 response that kills bacterial population in macrophages but not in MSCs thereby  
426 blunting the efficacy.

427 How *Mtb* enjoys such privileged lifestyle within ADSCs became finally apparent  
428 through the microarray analysis revealing massive increase in the synthesis and  
429 secretion of PGE2 by infected ADSCs. PGE2 is a multifunctional effector, with  
430 diverse roles in immune-regulation<sup>66</sup>. PGE2 mediated immunomodulation of other  
431 cells by MSCs has also been extensively reported<sup>45,46</sup>. However here we report a  
432 unique autocrine immune-modulatory function of PGE2 in MSCs. Inhibiting PGE2  
433 signaling was able to revert the pro-bacterial effects of IFN $\gamma$ , TNF $\alpha$  or MK571,  
434 suggesting PGE2 as the converging factor, which helps better bacterial survival  
435 within ADSCs. In contrast to the pro-bacterial role of PGE2 observed by us, several  
436 studies in the past report protective role of PGE2 against *Mtb*. Thus, loss of PTGES2  
437 makes animals more susceptible to tuberculosis<sup>67,68</sup>. Similarly, EP2 receptor  
438 knockout mice also show increased bacterial burden in the lungs<sup>69</sup>. Interestingly,  
439 PGE2 treatment is more effective in controlling lung CFU only in hyper-susceptible  
440 animals lacking IL1R1<sup>67</sup>, with absolutely no effect in WT animals. On the similar  
441 line, WT animals and *ptgs2* animals (lacking the enzymatic activity) did not have any  
442 difference in bacterial survival<sup>67</sup>. On the other hand, during late phase of

443 mycobacterial infection and not during early phase of infection, COX2 inhibition has  
444 protective effects *in vivo* <sup>70</sup>. PGE2 is also known to inhibit anti-bacterial effector  
445 functions of phagocytes including phagocytosis, NO production, lysosomal killing  
446 and antigen presentation <sup>69</sup>. Incidentally aspirin is currently in clinical trial as adjunct  
447 therapy against tuberculosis meningitis in adults <sup>71</sup>. COX2 inhibitors specially non-  
448 steroid anti-inflammatory drugs (NSAIDs) like aspirin, ibuprofen, rofecoxib,  
449 celecoxib etc. are routinely used for controlling diverse inflammatory states <sup>72</sup>.  
450 Results from our experiments suggest, smart inclusion of COX2 inhibitors in standard  
451 tuberculosis treatment/prevention regimens could enhance the efficacy of treatment.  
452 The two major hurdles in the tuberculosis control program are a) lack of effective  
453 vaccine and b) highly diminished efficacy of anti-TB drugs *in vivo* with respect to *in*  
454 *vitro*. This study shows MSCs contribute to both these crucial aspects of tuberculosis  
455 control. The remodeling of lung granulomas during tuberculosis has been explored  
456 previously <sup>73</sup>. However we show that recruitment and infection of MSCs in the  
457 granulomas could be critical events during remodeling considering the lifestyle of  
458 *Mtb* in MSCs is radically different than those in macrophages. The study therefore  
459 also highlights the limitations of reliance on *ex vivo* data generated through  
460 macrophage infection experiments in the past. We believe targeting the immune-  
461 privileged environment of MSCs will help develop alternative strategies to enhance  
462 both treatment and vaccine efficacy.

463

#### 464 **Acknowledgements**

465 The research in DK's group is supported by Wellcome-DBT India Alliance Senior  
466 fellowship (IA/S/17/1/503071). This work was partially supported by DBT, Govt. of  
467 India (BT/PR14730/BRB/10/874/2010) and SERB (EMR/2016/005296). NJ and VS



468 are recipients of SRF from CSIR, India and HK has received SRF from UGC. All the  
469 work involving *Mycobacterium tuberculosis* including animal infection experiments  
470 were performed at Tuberculosis Aerosol Challenge Facility (TACF), a DBT  
471 sponsored national facility hosted at ICGEB campus.

472

473

474

475

## 476 **Materials and Methods**

477 Ethical clearance: Studies on human samples were approved by IEC of AIIMS Ref  
478 no. IEC-304/02-06-2017 and ICGEB Ref no. ICGEB/IEC/2017/06-verII. Animal  
479 experiments were approved by Institutional Animal Ethics Committee, ICGEB  
480 (ICGEB/IAEC/280718/CI-14).

## 481 **Reagents, antibodies and plasmids**

482 Phorbol 12-myristate 13-acetate (PMA), bafilomycin A1, rapamycin, 3 MA,  
483 chloroquine, PKH, *Mtb* drugs (rifampicin, and pyrazinamide), chemical inhibitors (  
484 MK571, novobiocin, celecoxib, DMSO, BSA, MTT (1-(4,5-Dimethylthiazol-2-yl)-  
485 3,5-diphenylformazan) and paraformaldehyde were obtained from Sigma Aldrich Co  
486 (St Louis, MO, USA). Primary antibodies MAP1LC3B, (Cell Signaling Technology  
487 and Novus), GAPDH (Santa Cruz Biotechnology), Rab5, ABCC1 (abcam), Rab7,  
488 LAMP-1, ABCG2 (santa cruz), CD271, CD73 (BD Bioscience). All IR conjugated  
489 secondary antibodies for immunoblotting were obtained from LI-COR Biosciences  
490 (Lincoln, NE, USA) while Alexa fluor conjugated secondary antibodies were  
491 procured from invitrogen molecular Probes, Carlsbad, CA, USA. PGE2 elisa kit,  
492 isoniazid, propidium iodide (PI) were from cayman chemical, USA. Lysotracker red,  
493 JC-1 and cellroX green were from Life Technologies, USA. Human IFN- $\gamma$  and human  
494 TNF- $\alpha$  were purchased from ebiosciences. siRNAs (ABCC1, ABCG2) were from GE  
495 DHARMACON. Safranin O, Oil Red O and Alizarin Red S was purchased from SRL  
496 chemicals.

497 **Cell culture**

498 Adipose tissue derived mesenchymal stem cells (ADSC) were purchased from life  
499 technology (cat no - R7788115) and maintained in mesenPRO RS media (cat no  
500 12746012) supplemented with growth factors at 37°C, 5% CO<sub>2</sub>, humidified incubator  
501 as per the manufacturer instructions and guidelines. For all *in vitro* experiments,  
502 ADSC were seeded at the required density, allowed to adhere to the surface for 24-36  
503 hours before proceeding with the experiment.

504 Human monocytic cell line THP-1 were obtained from American type culture  
505 collection (ATCC) and cultured in RPMI 1640 medium along with 10% fetal bovine  
506 serum (FBS) at 37°C, 5% CO<sub>2</sub> humidified incubator. THP-1 derived macrophages  
507 (dTHP-1) were obtained by treating THP-1 cells with 20ng/ml phorbol myristate  
508 acetate (PMA, sigma) for 24 hours followed by PMA removal and maintenance in  
509 complete media.

510 **MSC Characterization**

511 MSC characterization into 3 lineages i.e. osteocytes, chondrocytes and adipocytes  
512 were done according to the differentiation protocol by life technologies. In brief,  
513 MSC were seeded in 24 well plate and after 6-8 hours of adherence their media was  
514 replaced with adipocyte differentiation media (cat no A1007001), chondrocyte  
515 differentiation media (cat no A1007101) and osteocyte differentiation media (cat no  
516 A1007201). Media was replaced every 3<sup>rd</sup> day till 14<sup>th</sup> day. After 14 days, cells were  
517 fixed and stained with Alizarin red S for chondrocytes, Oil Red O for adipocytes,  
518 Safranin O for osteocytes.

519 **Bacterial cultures and *in vitro* infection experiments**

520 Virulent laboratory strain H37Rv and vaccine strain BCG bacterial cultures were  
521 grown in 7H9 media (BD Difco) supplemented with 10% Albumin - Dextrose -  
522 Catalase (ADC, BD Difco) and incubated in an orbital shaker at 100 rpm, 37° C  
523 until the mid-log phase. Single cell suspension required for carrying out infection  
524 experiments were prepared by passing bacterial culture through a series of different  
525 gauge needles, five times through 23 gauge and 26 gauge and thrice through 30  
526 gauge.

527 For macrophage experiments, bacterial infection was set up for 4 hours followed by  
528 RPMI wash and addition of amikacin sulphate at a final concentration of 200µg/ml  
529 for 2 hours to kill any extracellular bacteria. For ADSCs, infection was done for 12  
530 hours followed by addition of amikacin sulphate (200µg/ml) for 2 hours and

531 replenishment of fresh media. All the treatments of drug, cytokines, autophagy  
532 modulators or chemical inhibitors were done 24 hours before the 6<sup>th</sup> day and 3<sup>rd</sup> day  
533 time point for ADSC and dTHP-1 respectively while siRNA transfections were done  
534 48hrs before the 6<sup>th</sup> day and 3<sup>rd</sup> day time point for ADSC and dTHP-1 respectively.  
535 Bacterial colony forming units (CFU) were enumerated by adding lysis buffer, 7H9  
536 containing 0.1% SDS in the required plate and incubating for 5 min and plating on  
537 7H11 agar plates supplemented with OADC (BD Difco). The plates were incubated at  
538 37°C to allow bacterial growth, and counts were performed after 21 days. Percent  
539 tolerant population was calculated for CFU obtained in drug treated set as percent of  
540 the CFU in the untreated set from the same experiment.

#### 541 **MTT Assay**

542 Cell viability was assessed by performing MTT (sigma) [3-(4,5-dimethyl-2-thiazolyl)-  
543 2,5-diphenyl-2H-tetrazolium bromide] assay. At indicated time points, media was  
544 removed from the plate and washed once with phenol free RPMI. MTT was prepared  
545 in phenol free RPMI at a working concentration of 1 mg/ml. 100 µl of MTT solution  
546 was added to each well of 96 well plates and incubated for appropriate time in cell  
547 incubator. Thereafter, MTT solution was removed and formazan crystals were  
548 dissolved in 100 µl DMSO. Samples obtained thereafter were quantified by  
549 measuring their absorbance at 560 nm in the plate reader.

#### 550 **Confocal microscopy**

551 For confocal experiments, bacteria were stained with CellVue@claret dye (sigma) or  
552 PKF67, far-red/green lipophilic dye, according to the manufactures protocol and  
553 resuspended into final media and incubated with cells for infection. To visualize  
554 acidified compartments, LysoTracker red dye (LysoTracker Red DND-99; Life  
555 Technologies) was added to the sample wells at a concentration of 500 nM for 30  
556 mins. Cells were fixed in 4% (w/v) PFA for 15-20 mins, followed by PBS wash twice  
557 and ammonium chloride treatment for 15 mins. Cells were again washed with PBS  
558 and incubated with 0.2 % TritonX-100 in 1X PBS for 20 min to ensure  
559 permeabilization. It was followed by blocking solution (3% BSA in 1X PBST) for 1  
560 hour. Cells were then incubated with primary antibody for 2-3 hours at RT, followed  
561 by PBST wash and conjugated secondary antibody for an hour. Cells were given a  
562 final wash with 1X PBS and coverslips were mounted in ProLong Gold antifade  
563 reagent (Life Technologies). Images were acquired by NIS-Elements software using  
564 the Nikon A1R laser scanning confocal microscope equipped with a Nikon Plan Apo

565 60× 1.40-numerical-aperture (NA) oil immersion objective. Serial confocal sections,  
566 0.5 µm thick, were acquired within a z-stack spanning 10 to 15 µm to form a  
567 composite image. Images were analysed using Imaris and image J software

568

### 569 **Flow cytometry**

570 Surface and intracellular protein expression in THP-1 and ADSC were carried out  
571 using flow cytometry. At required time points, cells were scrapped off, pelleted and  
572 washed. Cells were pelleted down at 1000 rpm and blocked in 3% BSA in 1X PBS  
573 and incubated with primary antibody for 3 hr in blocking buffer followed by  
574 incubation with alexa flour 488 conjugated secondary antibody for 2 hrs (surface  
575 expression). Intracellular expression was assessed after permeabilizing cells with  
576 0.05% saponin, followed by blocking, primary and secondary antibody incubation.  
577 After incubations cells were washed with 1X PBS and re-suspended in 1X PBS and  
578 samples were acquired in BD FACS Canto II by using FACS Diva acquisition  
579 software. For measurement of cellular ROS, cells were scrapped at required time  
580 point and stained with CellROX Green before acquisition on BD FACS Canto II.  
581 Staining of the dyes were performed as per the manufacturer's directions. The data  
582 was analyzed using Flow Jo V. software.

### 583 **Real time PCR and Microarray**

584 Total RNA from ADSC and dTHP-1 cells was isolated using mdi RNA isolation kit.  
585 cDNA was synthesized from 500ng of total RNA by reverse transcriptase PCR using  
586 Bio-RAD iScript cDNA synthesis kit according to the manufacturer's protocol.  
587 ADSC and dTHP-1 cDNA samples was run in triplicate using β-tubulin and actin as  
588 normalizing control respectively using SYBR green dye for real time fluorescence  
589 acquisition on the Bio-Rad CFX 96 Real time PCR system. Primers were synthesized  
590 from Sigma Aldrich Chemicals Ltd. Primers used: ABCC1  
591 (F:CGAGAACCAGAAGGCCTATTAC, R:ACAGGGCAGCAAACAGAA) ABCG2  
592 (F:CTTCGGCTTGCAACAACACTATG,R:CCAGACACACCACGGATAAA), Tubulin  
593 (F:TTGGCCAGATCTTTAGACCAGACAAC,R:  
594 CCGTACCACATCCAGGACAGAATC),Actin (F:  
595 ACCTTCTACAATGAGCTGCG, R: CCTGGATAGCAACGTACATGG)

596

597 For microarray, total RNA from ADSC uninfected or infected H37Rv was extracted  
598 using MDI RNA isolation kit. Samples were sent to Bionivid Technologies,

599 Bangalore for cDNA synthesis and hybridization to 25 “Illumina human  
600 WholeGenome-6 version 2 BeadChips” using standard illumina protocols. Six  
601 biological replicates were used for hybridization.

### 602 **C57BL/6 aerosol challenge**

603 All mice experiments were carried out in the Tuberculosis Aerosol Challenge Facility  
604 (TACF, ICGEB, New Delhi, India). C56BL/6 mice were housed in cages contained  
605 within a biosafety level 3 laminar flow enclosure. Aerosol challenge of 100 CFU was  
606 given to the animals in a Wisconsin-Madison chamber according to the standardized  
607 protocol. To check for infection establishment, two animals were selected randomly  
608 and humanely euthanized 24 hours post-aerosol challenge. The lungs and spleen  
609 tissues were harvested and homogenized to enumerate CFU. Tissue lysates were  
610 serially diluted and plated on petri plates containing Middlebrook 7H11 agar (Difco)  
611 supplemented with 10% OADC (Becton, Dickinson) and 0.5% glycerol.

### 612 **Animal dosing, CFU plating and FACS sorting**

613 For *in vivo* experiments, drug dosing was initiated 4 weeks post-aerosol challenge and  
614 the animals were administered the drug by oral gavage at a dose of 10 mg/kg INH and  
615 50 mg/kg celecoxib in combination and individually every day till 12 weeks. After 8  
616 and 12 weeks, 6 mice in each group were euthanized, followed by removal of lung  
617 and spleen and their homogenization and plating. Half lung was used in the  
618 preparation of single cell suspension followed by FACS sorting and subsequent  
619 plating. To begin with the tissue was washed with PBS, chopping it in small pieces  
620 followed by addition of 20U/ml DNAses, 1mg/ml collagenase D and incubation for  
621 30 mins at 37C. This is passed through nylon mesh to get single cell suspension. The  
622 cells were pelleted at 2000 rpm, treated with RBC lysis buffer, washed with PBS.  
623 Cells were stained with the antibody cocktail of CD45, CD73, CD11b, ly6G, sca-1  
624 and just before sorting PI were added at 5µg/ml for live/dead staining. All the cells  
625 were sorted to get the maximum number of sorted cells which were then pelleted,  
626 lysed and plated.

### 627 **Immunohistochemistry**

628 Five-micron thick sections of tissue were taken on the coated slide. Deparaffinization  
629 was done by dipping the slides in xylene for 5 mins (2 changes), acetone for 2-3 mins,  
630 alcohol for 2-3 mins and then under running/tap water. Antigen retrieval was

631 performed with citrate buffer (pH=6) in microwave oven, at 100°C for 30 minutes.  
632 Endogenous peroxidase blocking was done with 4% Hydrogen peroxide in methanol.  
633 Rabbit anti-Ag85B primary antibody was added (1:400) and incubated overnight.  
634 Thereafter goat anti-rabbit IgG H&L (ab6721) was added and incubated for 40  
635 minutes followed by 200 µl of enhancer for 5 minutes at RT. For color development,  
636 3-amino-9-ethylcarbazole chromogen was used at RT for 15 minutes. Thereafter the  
637 Mouse anti-CD73 antibody (ab91086, abcam, Cambridge, USA) was added in a  
638 dilution of 1:500 overnight at RT. Alkaline phosphatase tagged goat anti-mouse IgG  
639 H&L secondary antibody (ab7069) was added (1:200) for 40 minutes at room  
640 temperature. Color was developed using a Stay Green/ AP plus kit (ab156428)  
641 following manufacturer's protocol.

#### 642 **Statistical analysis**

643 Statistical significance for comparisons between two sets of the experiments was done  
644 using unpaired two-tailed Students's *t*-test. \*\*denotes significant difference at  $P<0.01$   
645 and \* at  $P<0.05$ .



646 **References**

- 647 1 Russell, D. G., Barry, C. E., 3rd & Flynn, J. L. Tuberculosis: what we don't  
648 know can, and does, hurt us. *Science (New York, N.Y.)* **328**, 852-856,  
649 doi:10.1126/science.1184784 (2010).
- 650 2 Voss, G. *et al.* Progress and challenges in TB vaccine development.  
651 *F1000Research* **7**, 199-199, doi:10.12688/f1000research.13588.1 (2018).
- 652 3 Streicher, E. M. *et al.* Emergence and treatment of multidrug resistant  
653 (MDR) and extensively drug-resistant (XDR) tuberculosis in South Africa.  
654 *Infection, Genetics and Evolution* **12**, 686-694,  
655 doi:<https://doi.org/10.1016/j.meegid.2011.07.019> (2012).
- 656 4 Ehlers, S. & Schaible, U. E. The granuloma in tuberculosis: dynamics of a  
657 host-pathogen collusion. *Frontiers in immunology* **3**, 411-411,  
658 doi:10.3389/fimmu.2012.00411 (2013).
- 659 5 Boshoff, H. I. & Barry, C. E., 3rd. Tuberculosis - metabolism and  
660 respiration in the absence of growth. *Nature reviews. Microbiology* **3**, 70-  
661 80, doi:10.1038/nrmicro1065 (2005).
- 662 6 Cunningham-Bussel, A., Zhang, T. & Nathan, C. F. Nitrite produced by  
663 *Mycobacterium tuberculosis* in human macrophages in physiologic  
664 oxygen impacts bacterial ATP consumption and gene expression.  
665 *Proceedings of the National Academy of Sciences of the United States of*  
666 *America* **110**, E4256-E4265, doi:10.1073/pnas.1316894110 (2013).
- 667 7 Wayne, L. G. & Hayes, L. G. An in vitro model for sequential study of  
668 shutdown of *Mycobacterium tuberculosis* through two stages of  
669 nonreplicating persistence. *Infect Immun* **64**, 2062-2069 (1996).
- 670 8 Yang, C.-S., Yuk, J.-M. & Jo, E.-K. The role of nitric oxide in mycobacterial  
671 infections. *Immune network* **9**, 46-52, doi:10.4110/in.2009.9.2.46 (2009).
- 672 9 Flentie, K., Garner, A. L. & Stallings, C. L. *Mycobacterium tuberculosis*  
673 Transcription Machinery: Ready To Respond to Host Attacks. *Journal of*  
674 *bacteriology* **198**, 1360-1373, doi:10.1128/JB.00935-15 (2016).
- 675 10 Mehta, M., Rajmani, R. S. & Singh, A. *Mycobacterium tuberculosis* WhiB3  
676 Responds to Vacuolar pH-induced Changes in Mycothiol Redox Potential  
677 to Modulate Phagosomal Maturation and Virulence. *The Journal of*  
678 *biological chemistry* **291**, 2888-2903, doi:10.1074/jbc.M115.684597  
679 (2016).
- 680 11 Mehta, M. & Singh, A. *Mycobacterium tuberculosis* WhiB3 maintains redox  
681 homeostasis and survival in response to reactive oxygen and nitrogen  
682 species. *Free Radic Biol Med* **131**, 50-58,  
683 doi:10.1016/j.freeradbiomed.2018.11.032 (2018).
- 684 12 Cosma, C. L., Sherman, D. R. & Ramakrishnan, L. The secret lives of the  
685 pathogenic mycobacteria. *Annu Rev Microbiol* **57**, 641-676,  
686 doi:10.1146/annurev.micro.57.030502.091033 (2003).
- 687 13 Guirado, E., Schlesinger, L. S. & Kaplan, G. Macrophages in tuberculosis:  
688 friend or foe. *Seminars in immunopathology* **35**, 563-583,  
689 doi:10.1007/s00281-013-0388-2 (2013).
- 690 14 Beigier-Bompadre, M. *et al.* *Mycobacterium tuberculosis* infection  
691 modulates adipose tissue biology. *PLOS Pathogens* **13**, e1006676,  
692 doi:10.1371/journal.ppat.1006676 (2017).

- 693 15 Lyadova, I. V. Neutrophils in Tuberculosis: Heterogeneity Shapes the  
694 Way? *Mediators of Inflammation* **2017**, 8619307,  
695 doi:10.1155/2017/8619307 (2017).
- 696 16 Russell, D. G., Cardona, P.-J., Kim, M.-J., Allain, S. & Altare, F. Foamy  
697 macrophages and the progression of the human TB granuloma. *Nature*  
698 *immunology* **10**, 943-948, doi:10.1038/ni.1781 (2009).
- 699 17 Scordo, J. M., Knoell, D. L. & Torrelles, J. B. Alveolar Epithelial Cells in  
700 Mycobacterium tuberculosis Infection: Active Players or Innocent  
701 Bystanders? *Journal of innate immunity* **8**, 3-14, doi:10.1159/000439275  
702 (2016).
- 703 18 Khan, A. *et al.* Mesenchymal stem cells internalize Mycobacterium  
704 tuberculosis through scavenger receptors and restrict bacterial growth  
705 through autophagy. *Scientific Reports* **7**, 15010, doi:10.1038/s41598-017-  
706 15290-z (2017).
- 707 19 Raghuvanshi, S., Sharma, P., Singh, S., Van Kaer, L. & Das, G.  
708 Mycobacterium tuberculosis evades host immunity by recruiting  
709 mesenchymal stem cells. *Proceedings of the National Academy of Sciences*  
710 *of the United States of America* **107**, 21653-21658,  
711 doi:10.1073/pnas.1007967107 (2010).
- 712 20 Das, B. *et al.* CD271(+) Bone Marrow Mesenchymal Stem Cells May  
713 Provide a Niche for Dormant Mycobacterium tuberculosis. *Science*  
714 *translational medicine* **5**, 170ra113-170ra113,  
715 doi:10.1126/scitranslmed.3004912 (2013).
- 716 21 Zhang, Y., Yew, W. W. & Barer, M. R. Targeting persisters for tuberculosis  
717 control. *Antimicrobial agents and chemotherapy* **56**, 2223-2230,  
718 doi:10.1128/AAC.06288-11 (2012).
- 719 22 Gomez, J. E. & McKinney, J. D. M. tuberculosis persistence, latency, and  
720 drug tolerance. *Tuberculosis (Edinburgh, Scotland)* **84**, 29-44 (2004).
- 721 23 Wakamoto, Y. *et al.* Dynamic persistence of antibiotic-stressed  
722 mycobacteria. *Science (New York, N.Y.)* **339**, 91-95,  
723 doi:10.1126/science.1229858 (2013).
- 724 24 Bernardo, M. E. & Fibbe, W. E. Mesenchymal stromal cells: sensors and  
725 switchers of inflammation. *Cell Stem Cell* **13**, 392-402,  
726 doi:10.1016/j.stem.2013.09.006 (2013).
- 727 25 Singer, N. G. & Caplan, A. I. Mesenchymal stem cells: mechanisms of  
728 inflammation. *Annu Rev Pathol* **6**, 457-478, doi:10.1146/annurev-pathol-  
729 011110-130230 (2011).
- 730 26 Zhao, Q., Ren, H. & Han, Z. Mesenchymal stem cells: Immunomodulatory  
731 capability and clinical potential in immune diseases. *Journal of Cellular*  
732 *Immunotherapy* **2**, 3-20, doi:<https://doi.org/10.1016/j.jocit.2014.12.001>  
733 (2016).
- 734 27 Chandra, P. *et al.* Mycobacterium tuberculosis Inhibits RAB7 Recruitment  
735 to Selectively Modulate Autophagy Flux in Macrophages. *Scientific Reports*  
736 **5**, 16320, doi:10.1038/srep16320  
737 <https://www.nature.com/articles/srep16320> - [supplementary-information](#)  
738 (2015).
- 739 28 Karim, A. F. *et al.* Express Path Analysis Identifies a Tyrosine Kinase Src-  
740 centric Network Regulating Divergent Host Responses to Mycobacterium



- 741 tuberculosis Infection. *The Journal of biological chemistry* **286**, 40307-  
742 40319, doi:[10.1074/jbc.M111.266239](https://doi.org/10.1074/jbc.M111.266239) (2011).
- 743 29 Kumar, D. *et al.* Genome-wide Analysis of the Host Intracellular Network  
744 that Regulates Survival of Mycobacterium tuberculosis. *Cell* **140**, 731-743,  
745 doi:<https://doi.org/10.1016/j.cell.2010.02.012> (2010).
- 746 30 Gottesman, M. M., Fojo, T. & Bates, S. E. Multidrug resistance in cancer:  
747 role of ATP-dependent transporters. *Nat Rev Cancer* **2**, 48-58,  
748 doi:[10.1038/nrc706](https://doi.org/10.1038/nrc706) (2002).
- 749 31 Szakacs, G., Paterson, J. K., Ludwig, J. A., Booth-Genthe, C. & Gottesman, M.  
750 M. Targeting multidrug resistance in cancer. *Nat Rev Drug Discov* **5**, 219-  
751 234, doi:[10.1038/nrd1984](https://doi.org/10.1038/nrd1984) (2006).
- 752 32 Zaman, G. J. *et al.* The human multidrug resistance-associated protein  
753 MRP is a plasma membrane drug-efflux pump. *Proceedings of the National*  
754 *Academy of Sciences of the United States of America* **91**, 8822-8826 (1994).
- 755 33 Lemos, C. *et al.* Folate deprivation induces BCRP (ABCG2) expression and  
756 mitoxantrone resistance in Caco - 2 cells. *International Journal of Cancer*  
757 **123**, 1712-1720, doi:[10.1002/ijc.23677](https://doi.org/10.1002/ijc.23677) (2008).
- 758 34 Klionsky, D. *et al.* *Guidelines for the use and interpretation of assays for*  
759 *monitoring autophagy (3rd edition)*. Vol. 12 (2016).
- 760 35 Liu, Y. *et al.* Immune activation of the host cell induces drug tolerance in  
761 Mycobacterium tuberculosis both in vitro and in vivo. *The Journal of*  
762 *experimental medicine* **213**, 809-825, doi:[10.1084/jem.20151248](https://doi.org/10.1084/jem.20151248) (2016).
- 763 36 MacGurn, J. A. & Cox, J. S. A Genetic Screen for &em&gt;Mycobacterium  
764 tuberculosis&lt;/em&gt; Mutants Defective for Phagosome Maturation  
765 Arrest Identifies Components of the ESX-1 Secretion System. *Infection and*  
766 *Immunity* **75**, 2668, doi:[10.1128/IAI.01872-06](https://doi.org/10.1128/IAI.01872-06) (2007).
- 767 37 Deretic, V. Autophagy, an immunologic magic bullet: Mycobacterium  
768 tuberculosis phagosome maturation block and how to bypass it. *Future*  
769 *microbiology* **3**, 517-524, doi:[10.2217/17460913.3.5.517](https://doi.org/10.2217/17460913.3.5.517) (2008).
- 770 38 Chandra, P. & Kumar, D. Selective autophagy gets more selective:  
771 Uncoupling of autophagy flux and xenophagy flux in Mycobacterium  
772 tuberculosis-infected macrophages. *Autophagy* **12**, 608-609,  
773 doi:[10.1080/15548627.2016.1139263](https://doi.org/10.1080/15548627.2016.1139263) (2016).
- 774 39 Matta, S. K. & Kumar, D. AKT mediated glycolytic shift regulates  
775 autophagy in classically activated macrophages. *The International Journal*  
776 *of Biochemistry & Cell Biology* **66**, 121-133,  
777 doi:<https://doi.org/10.1016/j.biocel.2015.07.010> (2015).
- 778 40 Ghannam, S., Bouffi, C., Djouad, F., Jorgensen, C. & Noel, D.  
779 Immunosuppression by mesenchymal stem cells: mechanisms and clinical  
780 applications. *Stem cell research & therapy* **1**, 2, doi:[10.1186/scrt2](https://doi.org/10.1186/scrt2) (2010).
- 781 41 Nemeth, K. *et al.* Bone marrow stromal cells attenuate sepsis via  
782 prostaglandin E(2)-dependent reprogramming of host macrophages to  
783 increase their interleukin-10 production. *Nature medicine* **15**, 42-49,  
784 doi:[10.1038/nm.1905](https://doi.org/10.1038/nm.1905) (2009).
- 785 42 Najar, M. *et al.* Mesenchymal stromal cells use PGE2 to modulate  
786 activation and proliferation of lymphocyte subsets: Combined comparison  
787 of adipose tissue, Wharton's Jelly and bone marrow sources. *Cellular*  
788 *Immunology* **264**, 171-179,  
789 doi:<https://doi.org/10.1016/j.cellimm.2010.06.006> (2010).

- 790 43 Corcione, A. *et al.* Human mesenchymal stem cells modulate B-cell  
791 functions. *Blood* **107**, 367-372, doi:10.1182/blood-2005-07-2657 (2006).
- 792 44 Ling, W. *et al.* Mesenchymal stem cells use IDO to regulate immunity in  
793 tumor microenvironment. *Cancer research* **74**, 1576-1587,  
794 doi:10.1158/0008-5472.can-13-1656 (2014).
- 795 45 Wang, B. *et al.* mTOR inhibition improves the immunomodulatory  
796 properties of human bone marrow mesenchymal stem cells by inducing  
797 COX-2 and PGE2. *Stem cell research & therapy* **8**, 292,  
798 doi:10.1186/s13287-017-0744-6 (2017).
- 799 46 Zhang, W. *et al.* Effects of mesenchymal stem cells on differentiation,  
800 maturation, and function of human monocyte-derived dendritic cells.  
801 *Stem cells and development* **13**, 263-271,  
802 doi:10.1089/154732804323099190 (2004).
- 803 47 Kalle, A. M. & Rizvi, A. Inhibition of bacterial multidrug resistance by  
804 celecoxib, a cyclooxygenase-2 inhibitor. *Antimicrob Agents Chemother* **55**,  
805 439-442, doi:10.1128/AAC.00735-10 (2011).
- 806 48 Reid, G. *et al.* The human multidrug resistance protein MRP4 functions as  
807 a prostaglandin efflux transporter and is inhibited by nonsteroidal  
808 antiinflammatory drugs. *Proceedings of the National Academy of Sciences*  
809 *of the United States of America* **100**, 9244-9249,  
810 doi:10.1073/pnas.1033060100 (2003).
- 811 49 Sharma, R., Madhusudhan, K. S. & Ahuja, V. Intestinal tuberculosis versus  
812 crohn's disease: Clinical and radiological recommendations. *The Indian*  
813 *journal of radiology & imaging* **26**, 161-172, doi:10.4103/0971-  
814 3026.184417 (2016).
- 815 50 Adams, K. N. *et al.* Drug tolerance in replicating mycobacteria mediated by  
816 a macrophage-induced efflux mechanism. *Cell* **145**, 39-53,  
817 doi:10.1016/j.cell.2011.02.022 (2011).
- 818 51 Sharom, F. J. ABC multidrug transporters: structure, function and role in  
819 chemoresistance. *Pharmacogenomics* **9**, 105-127,  
820 doi:10.2217/14622416.9.1.105 (2007).
- 821 52 Singh, A. *et al.* Expression of ABCG2 (BCRP), a Marker of Stem Cells, is  
822 Regulated by Nrf2 in Cancer Cells That Confers Side Population and  
823 Chemoresistance Phenotype. *Molecular cancer therapeutics* **9**, 2365-2376,  
824 doi:10.1158/1535-7163.MCT-10-0108 (2010).
- 825 53 Cole, S. P. C. & Deeley, R. G. Transport of glutathione and glutathione  
826 conjugates by MRP1. *Trends in Pharmacological Sciences* **27**, 438-446,  
827 doi:10.1016/j.tips.2006.06.008 (2006).
- 828 54 Liang, S.-C. *et al.* ABCG2 Localizes to the Nucleus and Modulates CDH1  
829 Expression in Lung Cancer Cells(). *Neoplasia (New York, N.Y.)* **17**, 265-  
830 278, doi:10.1016/j.neo.2015.01.004 (2015).
- 831 55 Seyffer, F. & Tampe, R. ABC transporters in adaptive immunity. *Biochimica*  
832 *et biophysica acta* **1850**, 449-460, doi:10.1016/j.bbagen.2014.05.022  
833 (2015).
- 834 56 Chandra, S. *et al.* Mrp1 is involved in lipid presentation and iNKT cell  
835 activation by *Streptococcus pneumoniae*. *Nat Commun* **9**, 4279,  
836 doi:10.1038/s41467-018-06646-8 (2018).

- 837 57 Bryan, J. *et al.* ABCC8 and ABCC9: ABC transporters that regulate K+  
838 channels. *Pflugers Archiv : European journal of physiology* **453**, 703-718,  
839 doi:10.1007/s00424-006-0116-z (2007).
- 840 58 Hampshire, T. *et al.* Stationary phase gene expression of Mycobacterium  
841 tuberculosis following a progressive nutrient depletion: a model for  
842 persistent organisms? *Tuberculosis (Edinburgh, Scotland)* **84**, 228-238,  
843 doi:10.1016/j.tube.2003.12.010 (2004).
- 844 59 Broekman, W. *et al.* TNF-alpha and IL-1beta-activated human  
845 mesenchymal stromal cells increase airway epithelial wound healing in  
846 vitro via activation of the epidermal growth factor receptor. *Respir Res* **17**,  
847 3, doi:10.1186/s12931-015-0316-1 (2016).
- 848 60 Ryan, J. M., Barry, F., Murphy, J. M. & Mahon, B. P. Interferon-gamma does  
849 not break, but promotes the immunosuppressive capacity of adult human  
850 mesenchymal stem cells. *Clin Exp Immunol* **149**, 353-363,  
851 doi:10.1111/j.1365-2249.2007.03422.x (2007).
- 852 61 Matta, S. K. & Kumar, D. Hypoxia and classical activation limits  
853 Mycobacterium tuberculosis survival by Akt-dependent glycolytic shift in  
854 macrophages. *Cell Death Discovery* **2**, 16022,  
855 doi:10.1038/cddiscovery.2016.22  
856 <https://www.nature.com/articles/cddiscovery201622> - [supplementary-](#)  
857 [information](#) (2016).
- 858 62 Atmakuri, K., Penn-Nicholson, A., Tanner, R. & Dockrell, H. M. Meeting  
859 report: 5th Global Forum on TB Vaccines, 20-23 February 2018, New  
860 Delhi India. *Tuberculosis (Edinburgh, Scotland)* **113**, 55-64,  
861 doi:10.1016/j.tube.2018.08.013 (2018).
- 862 63 Bertholet, S. *et al.* Identification of human T cell antigens for the  
863 development of vaccines against Mycobacterium tuberculosis. *Journal of*  
864 *immunology (Baltimore, Md. : 1950)* **181**, 7948-7957 (2008).
- 865 64 Lewinsohn, D. A., Lewinsohn, D. M. & Scriba, T. J. Polyfunctional CD4(+) T  
866 Cells As Targets for Tuberculosis Vaccination. *Frontiers in immunology* **8**,  
867 1262-1262, doi:10.3389/fimmu.2017.01262 (2017).
- 868 65 Ritz, N., Hanekom, W. A., Robins-Browne, R., Britton, W. J. & Curtis, N.  
869 Influence of BCG vaccine strain on the immune response and protection  
870 against tuberculosis. *FEMS Microbiology Reviews* **32**, 821-841,  
871 doi:10.1111/j.1574-6976.2008.00118.x (2008).
- 872 66 Kalinski, P. Regulation of immune responses by prostaglandin E2. *Journal*  
873 *of immunology (Baltimore, Md. : 1950)* **188**, 21-28,  
874 doi:10.4049/jimmunol.1101029 (2012).
- 875 67 Mayer-Barber, K. D. *et al.* Host-directed therapy of tuberculosis based on  
876 interleukin-1 and type I interferon crosstalk. *Nature* **511**, 99-103,  
877 doi:10.1038/nature13489 (2014).
- 878 68 Divangahi, M. *et al.* Mycobacterium tuberculosis evades macrophage  
879 defenses by inhibiting plasma membrane repair. *Nat Immunol* **10**, 899-  
880 906, doi:10.1038/ni.1758 (2009).
- 881 69 Kaul, V. *et al.* An important role of prostanoid receptor EP2 in host  
882 resistance to Mycobacterium tuberculosis infection in mice. *J Infect Dis*  
883 **206**, 1816-1825, doi:10.1093/infdis/jis609 (2012).

- 884 70 Rangel Moreno, J. *et al.* The role of prostaglandin E2 in the  
885 immunopathogenesis of experimental pulmonary tuberculosis.  
886 *Immunology* **106**, 257-266 (2002).
- 887 71 Mai, N. T. *et al.* A randomised double blind placebo controlled phase 2  
888 trial of adjunctive aspirin for tuberculous meningitis in HIV-uninfected  
889 adults. *eLife* **7**, doi:10.7554/eLife.33478 (2018).
- 890 72 Crofford, L. J. Use of NSAIDs in treating patients with arthritis. *Arthritis*  
891 *research & therapy* **15 Suppl 3**, S2-S2, doi:10.1186/ar4174 (2013).
- 892 73 Dheda, K. *et al.* Lung remodeling in pulmonary tuberculosis. *J Infect Dis*  
893 **192**, 1201-1209, doi:10.1086/444545 (2005).
- 894

895

896 **Figure Legends:**

897

898 **Figure 1: ADSCs support better H37Rv survival and high drug tolerance**

899

900 (A) ADSCs were infected with GFP-Rv at 1:10 MOI, representative confocal images  
901 at 0 hour and 6<sup>th</sup> day post infection are shown. (B) MFI of GFP-Rv per cell calculated  
902 across 10 fields repeated in more than triplicate. (C) Growth kinetics of H37Rv within  
903 ADSCs across 12 days post-infection. (D) Growth kinetics of vaccine strain BCG  
904 within ADSCs on 2 and 3 days post-infection. (E) Growth kinetics of H37Rv within  
905 human MDMs and (F) in THP-1 macrophages across 0, 1,2 and 3 days post-infection.  
906 (G) H37Rv infected ADSCs were treated with isoniazid (INH), and rifampicin (RIF),  
907 0.1 – 5 µg/ml, for 24 hours on 8<sup>th</sup> day post-infection, and cells were plated for CFU  
908 enumeration. (H) Percent drug tolerant bacterial population to INH (1 µg/ml) within  
909 infected ADSCs (blue) on 3<sup>rd</sup>, 6<sup>th</sup>, 9<sup>th</sup>, 12<sup>th</sup> day and within THP-1 macrophages (black)  
910 on 1<sup>st</sup>, 2<sup>nd</sup> and 3<sup>rd</sup> days post-infection, respectively. (I) Percent drug tolerant bacterial  
911 population to RIF (0.5 µg/ml) within infected ADSCs (blue) on 3<sup>rd</sup>, 6<sup>th</sup>, 9<sup>th</sup> days and  
912 within THP-1 macrophages (black) on 1<sup>st</sup>, 2<sup>nd</sup> and 3<sup>rd</sup> days post-infection,  
913 respectively. (J) Line histogram of surface and intracellular (I.C.) staining of  
914 ABCC1/MRP-1 and ABCG2/BCRP in uninfected (Blue line) and in H37Rv-infected  
915 ADSCs (Green line), 6 days post-infection. Red line represents the isotype control.  
916 (K) Percent INH (1µg/ml) tolerant bacterial population in ADSCs after knocking  
917 down ABCC1 (200 nM siRNA) or ABCG2 (200 nM siRNA) alone or in combination,  
918 in H37Rv-infected ADSCs. The siRNAs were added 24 hours prior to treatment with  
919 INH for additional 24 hours and CFU plating was carried out on 6<sup>th</sup> day post-  
920 infection. (L) H37Rv CFU from ADSCs on 6<sup>th</sup> day after siRNA mediated knockdown  
921 of ABCC1 and ABCG2 for 48 hours prior to the time point. Data are from three or  
922 more independent experiments. Error bar represent S.E.M. \*p < 0.05, \*\*p < 0.005,  
923 \*\*\*p < 0.0005, \*\*\*\*p < 0.00005, NS ‘not significant’ by two-tailed Student’s t-test.  
924 Scale bars, 10 µm.

925

926 **Figure 2: Lysosomal killing of bacteria in MSCs and effect of inflammatory**  
927 **cytokines**

928

929 (A) Percent INH tolerant H37Rv population after addition of autophagy modulators  
930 bafilomycinA1 (BafA1, 100 nM), 3- methyl adenine (3-MA, 5mM), chloroquine (100  
931 µM), and rapamycin (100 nM) for 6 hours before CFU plating on 6<sup>th</sup> day post-  
932 infection in ADSCs. (B) H37Rv infected ADSCs were treated with BafA1 (100nM),  
933 3-MA (5mM), chloroquine (100 µM) and rapamycin (100nM) for 6 hours prior to  
934 CFU plating on the 6<sup>th</sup> day post-infection. (C) Percent INH-tolerant H37Rv  
935 population after treatment of infected THP-1 macrophages with 100 units/ml IFN $\gamma$   
936 and 20 ng/ml TNF $\alpha$  for 24 hour before CFU plating on 3<sup>rd</sup> day post-infection. (D)  
937 THP-1 macrophages were infected with H37Rv and treated with 100 units/ml IFN $\gamma$  or  
938 20 ng/ml TNF $\alpha$  for 24 hours prior to CFU plating on the 3<sup>rd</sup> day post-infection. (E)  
939 Dose dependent effect of IFN $\gamma$  (100, 250,500 units/ml) and TNF $\alpha$  (10, 20, 50 ng/ml)  
940 treatment (24 hours each) on percent INH tolerant population in H37Rv-infected  
941 ADSCs. (F) H37Rv survival within ADSCs after treatment with increasing doses of  
942 IFN $\gamma$  or TNF $\alpha$  for 24 hours prior to CFU plating on 6<sup>th</sup> day post-infection. (G, H)  
943 CFU assay of infected ADSCs (G) and infected THP-1 macrophages (H) after 24  
944 hours of IFN $\gamma$  or TNF $\alpha$  treatment in the presence of different doses of IFN $\gamma$ R1 and  
945 anti-TNF $\alpha$  purified proteins respectively. IFN $\gamma$ R1 or anti-TNF $\alpha$  was added along with



946 IFN $\gamma$  or TNF $\alpha$  treatments respectively **(I)** Representative confocal images of PKH67-  
947 labeled H37Rv and BCG infected ADSCs on 3<sup>rd</sup> day post-infection, co-stained with  
948 LysoTracker Red and LAMP-1 antibody. **(J)** Percent colocalization of PKH67 labeled  
949 H37Rv with compartments stained for LysoTracker Red, LAMP-1 or  
950 LysoTracker+LAMP1 in ADSCs which were either untreated control or treated with  
951 IFN $\gamma$  (100 units/ml), TNF $\alpha$  (20 ng/ml) or MK571 (50  $\mu$ M) for 24 hours prior to fixing  
952 the samples at 3<sup>rd</sup> day post-infection. **(J)** Percent colocalization of BCG with  
953 LysoTracker Red, LAMP-1 and LAMP-1+LysoTracker compartments at 3 days post-  
954 infection in ADSCs. **(L)** Colocalization of H37Rv to Cat D, LAMP-1 and lysoTracker  
955 Red triple positive compartment in infected ADSCs which were either untreated or  
956 treated with IFN $\gamma$  (100 units/ml), TNF $\alpha$  (20 ng/ml) or MK571 (50  $\mu$ M) for 24 hours  
957 prior to processing the samples on 3<sup>rd</sup> day post-infection. **(M)** Percent colocalization  
958 of H37Rv with ABCC1 within ADSCs in untreated or upon treatment with IFN $\gamma$  (100  
959 units/ml), TNF $\alpha$  (20 ng/ml) or MK571 (50  $\mu$ M) for 24 hours prior to harvesting the  
960 samples on 3<sup>rd</sup> day post-infection. Error bar represent S.E.M. \*P < 0.05, \*\*P < 0.005,  
961 \*\*\*P < 0.0005, \*\*\*\*P < 0.00005, NS 'not significant' by two-tailed Student's t-test.  
962 Scale bars, 10  $\mu$ m. All the data is compiled from three independent experiments.  
963

### 964 **Figure 3**

#### 965 **Lipid mediator PGE2 modulates lysosomal activity in *Mtb*-infected ADSCs**

966 **(A)** Uninfected or H37Rv infected ADSCs which were either untreated or treated with  
967 IFN $\gamma$  (100 units/ml), TNF $\alpha$  (20 ng/ml), MK571 (50  $\mu$ M) and celecoxib (250  $\mu$ M) for  
968 24 hours before performing supernatant ELISA on 6<sup>th</sup> day post-infection (post-  
969 seeding in uninfected cells). **(B)** H37Rv infected ADSCs were treated with different  
970 doses of celecoxib (50 $\mu$ m, 150 $\mu$ M, 250 $\mu$ M) in addition to IFN $\gamma$  (100 units/ml), TNF $\alpha$   
971 (20 ng/ml) or MK571 (50  $\mu$ M) for 24 hours before the cells were harvested for CFU  
972 plating on 6<sup>th</sup> day post-infection. **(C)** H37Rv infected ADSCs were treated with Cox-2  
973 siRNA or scramble siRNA (100nM siRNA) along with treatment with IFN $\gamma$  (100  
974 units/ml), TNF $\alpha$  (20 ng/ml) or MK571 (50  $\mu$ M) for 24 hours prior to CFU plating on  
975 6<sup>th</sup> day post-infection. **(D)** Colocalization of PKH67 labeled H37Rv with LysoTracker  
976 Red, LAMP-1, and Cathepsin D stained compartments in ADSCs after 24 hours of  
977 treatment with Celecoxib (250  $\mu$ M), PF04418948 (500 nM) or Cox-2 siRNA (100  
978 nM) before harvesting samples on 3<sup>rd</sup> day post-infection. **(E)** Percent INH tolerant  
979 population in ADSCs treated with celecoxib (250  $\mu$ M) along with addition of IFN $\gamma$   
980 (100 units/ml), TNF $\alpha$  (20 ng/ml) or MK571 (50  $\mu$ M) for 24 hours prior to CFU  
981 plating 6<sup>th</sup> day post-infection. **(F)** Percent INH-tolerant H37Rv population after  
982 treatment of infected ADSCs with 100 units/ml IFN $\gamma$  or 20 ng/ml TNF $\alpha$  for 24 hours  
983 in scramble or Cox-2 siRNA (100nM) treated cells and CFU plating was performed  
984 on 3<sup>rd</sup> day post-infection. **(G)** Percent RIF tolerant bacterial population in infected  
985 ADSCs treated with scrambled or cox-2 siRNA (100 nM) for 24 hours prior to CFU  
986 plating on 6<sup>th</sup> day post-infection. Error bar represent S.E.M. \*P < 0.05, \*\*P < 0.005,  
987 \*\*\*P < 0.0005, \*\*\*\*P < 0.00005, NS 'not significant' by two-tailed Student's t-test.  
988

#### 989 **Figure 4: PGE2 facilitates *Mtb* survival within MSCs *in vivo***

990 **(A)** Total bacterial CFU in the lungs of C57BL/6 mice infected with H37Rv via  
991 aerosol route ( $\sim 10^2$  bacilli/lung) administered with vector, celecoxib (50 mg/kg), INH  
992 (10 mg/kg) or combination of celecoxib with INH (50 mg/kg and 10 mg/kg  
993 respectively). Treatments started 4 weeks post-infection and were given every day for  
994 next 8 weeks. **(B)** Total bacterial CFU from the spleen of infected animals during the  
995 course of experiment mentioned above **(C)** Gating strategy for sorting of MSCs and

996 monocyte/macrophages from mice lung. Live singlet population was gated for CD45  
997 positive and negative population which were sub-gated based on Ly6G<sup>-</sup>CD11b<sup>high</sup> for  
998 macrophages or myeloid cells and Sca1<sup>+</sup>CD73<sup>+</sup> for MSCs respectively. **(D-E)** Change  
999 in tissue landscape with respect to macrophage (CD45<sup>+</sup>Ly6G<sup>-</sup>CD11b<sup>high</sup>) and MSCs  
1000 across 12 weeks of infection and treatment with celecoxib, INH or celecoxib+INH.  
1001 **(F-G)** *Mtb* survival within sorted macrophages (CD45<sup>+</sup>Ly6G<sup>-</sup>CD11b<sup>high</sup>) and MSCs  
1002 (CD45<sup>-</sup>sca1<sup>+</sup>CD73<sup>+</sup>) along the course of infection and treatment as discussed above.  
1003 **(H)** CD73 staining of biopsies from granuloma positive intestinal tuberculosis patient,  
1004 showing CD73 positive cells around the submucosal macrogranulomas (x 100, x 200).  
1005 **(I) (i)** A lung biopsy with an epithelioid cell granuloma surrounded by CD73 positive  
1006 (orange arrows) [Stay green] cells [x200]. Reddish-brown [AEC positive] *Mtb* bacilli  
1007 seen within the giant cells and within epithelioid histiocytes (Black arrows). **(ii)**  
1008 Another lung biopsy shows confluent epithelioid cell granulomas with a few AEC  
1009 stained bacilli (black arrows). **(iii)** A lymph node biopsy shows *Mtb* antigen positive  
1010 bacilli (Black arrow), with surrounding CD73 positive cells (Orange arrows) [x 400].

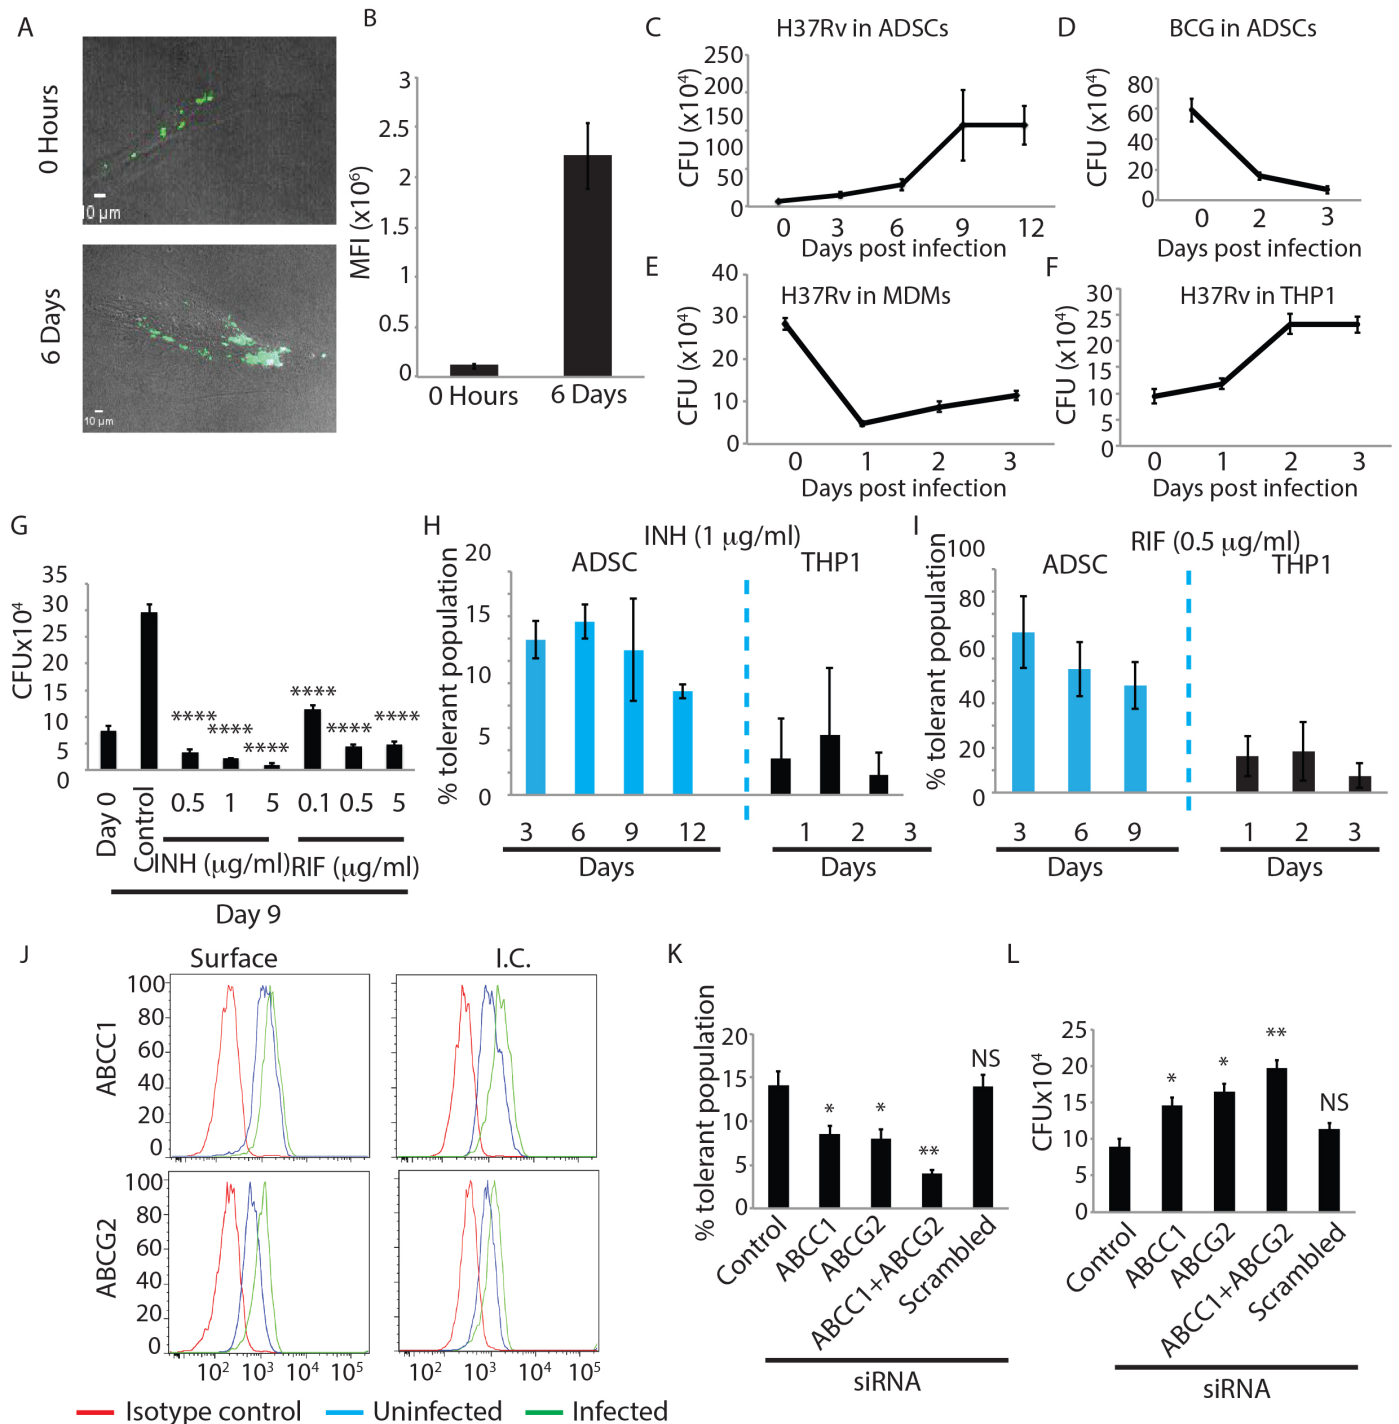



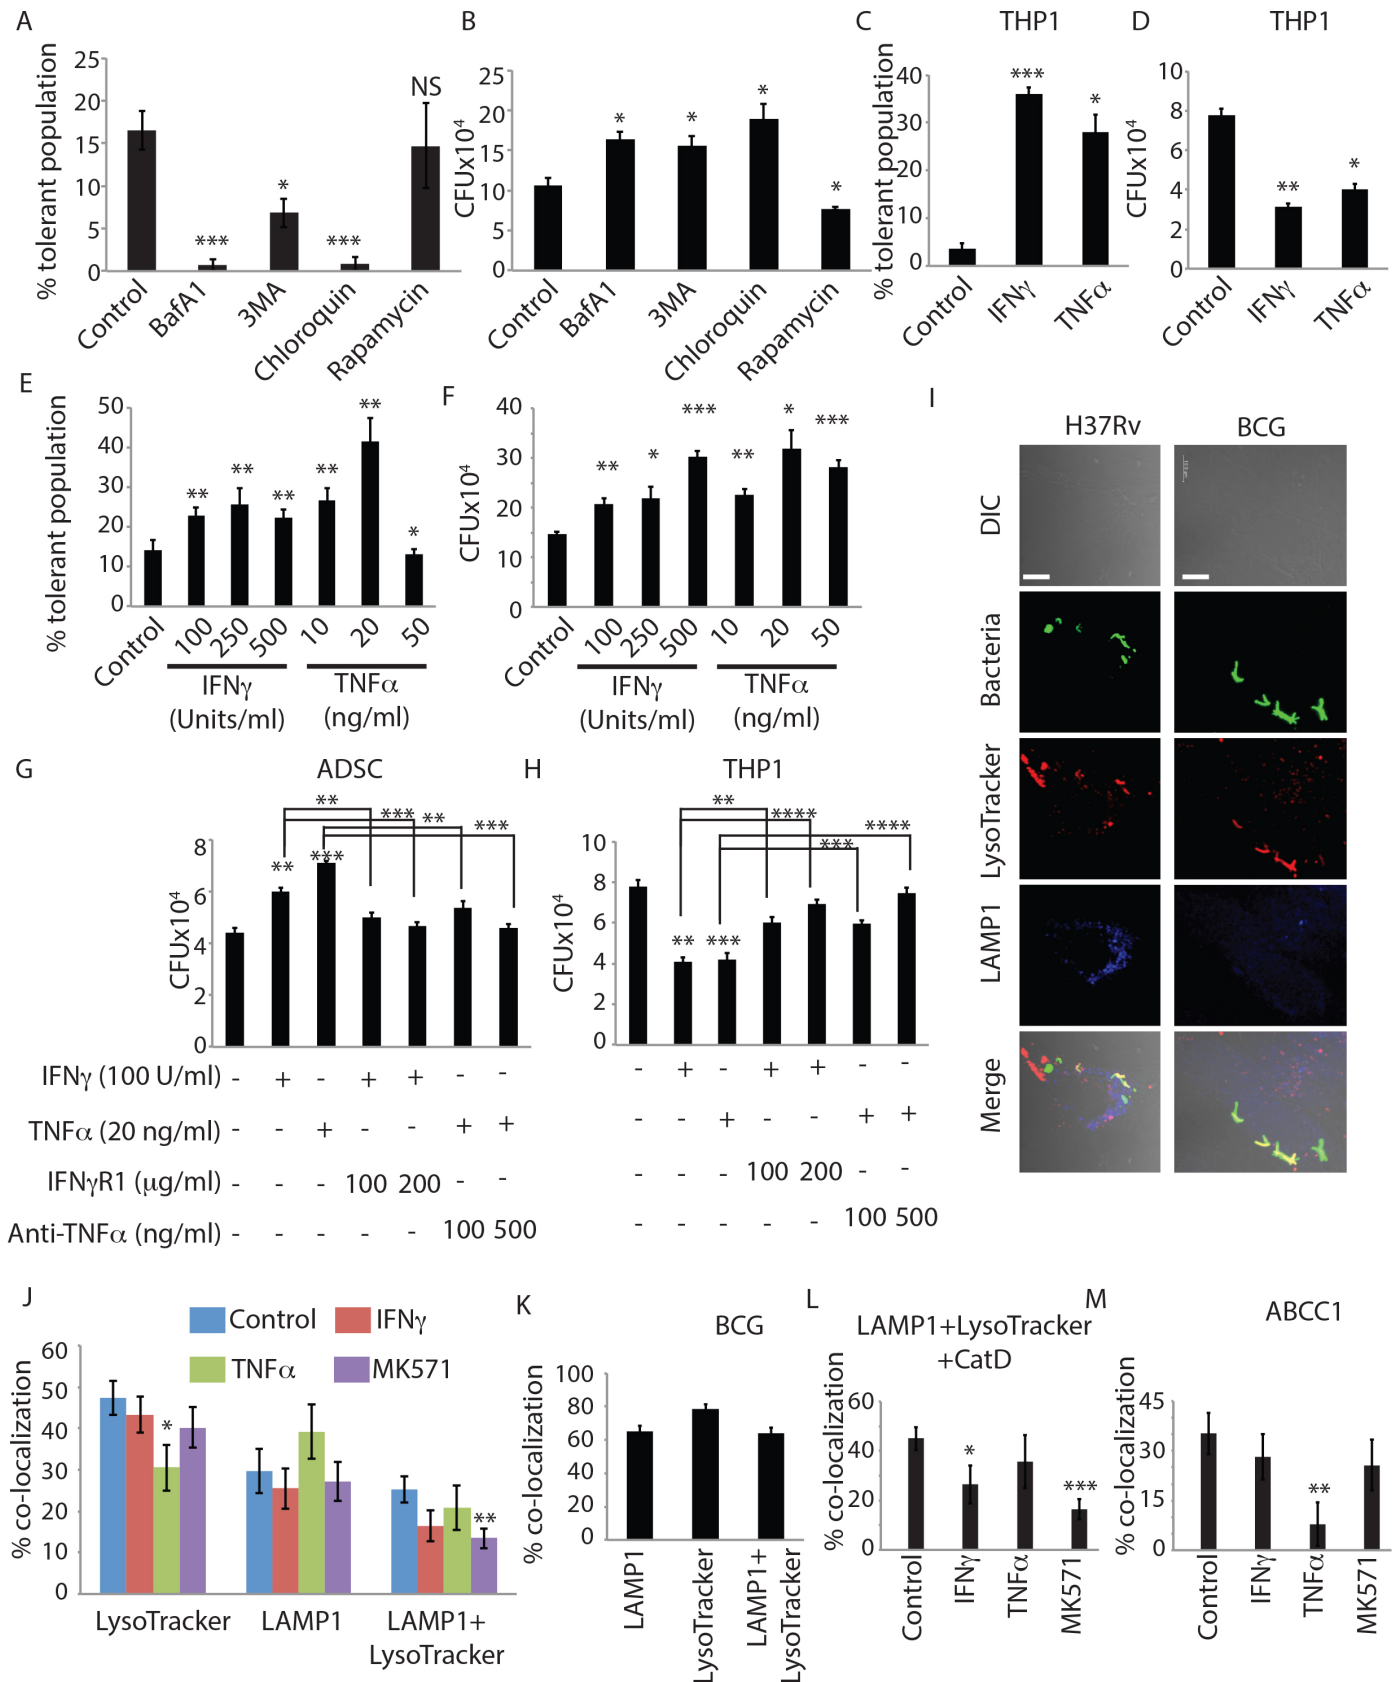

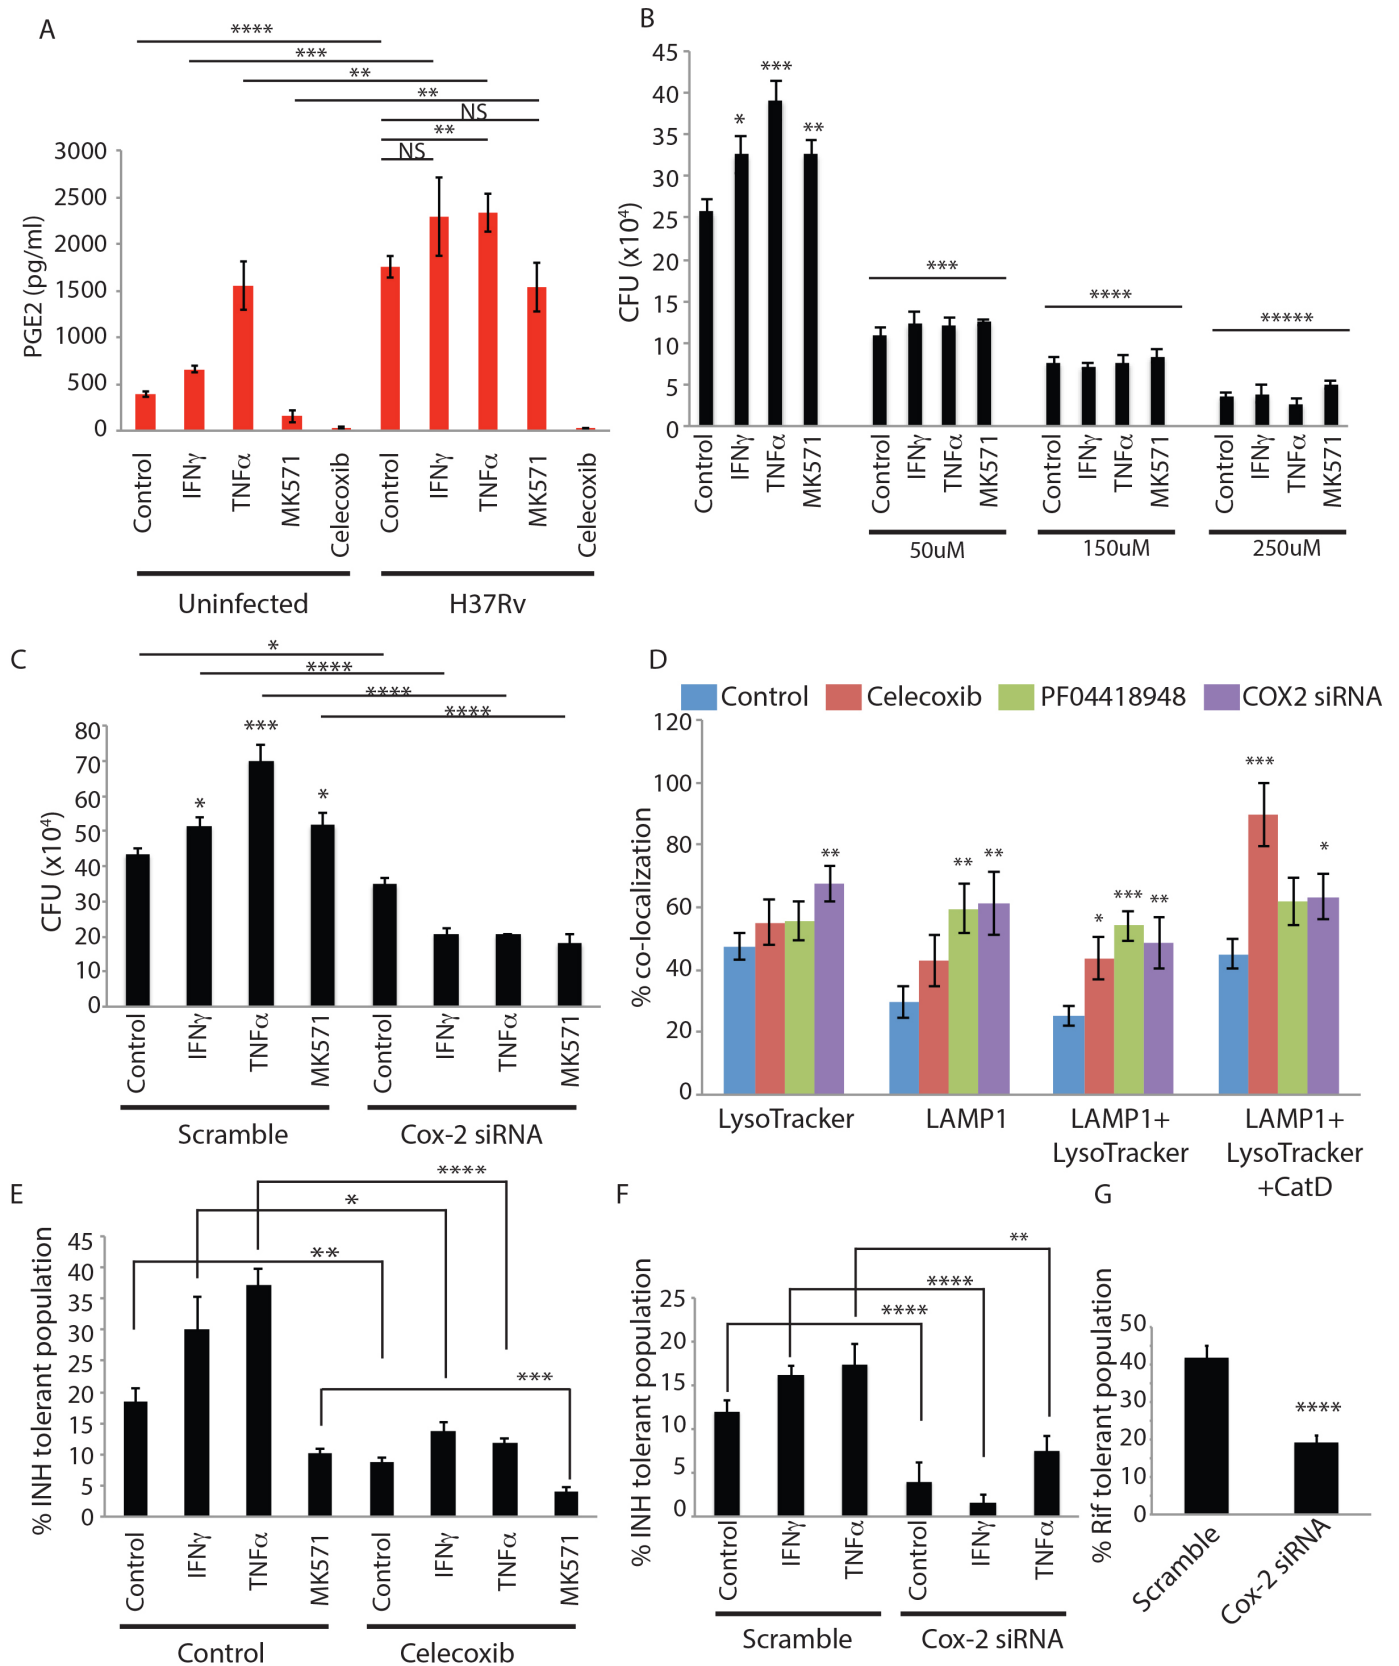

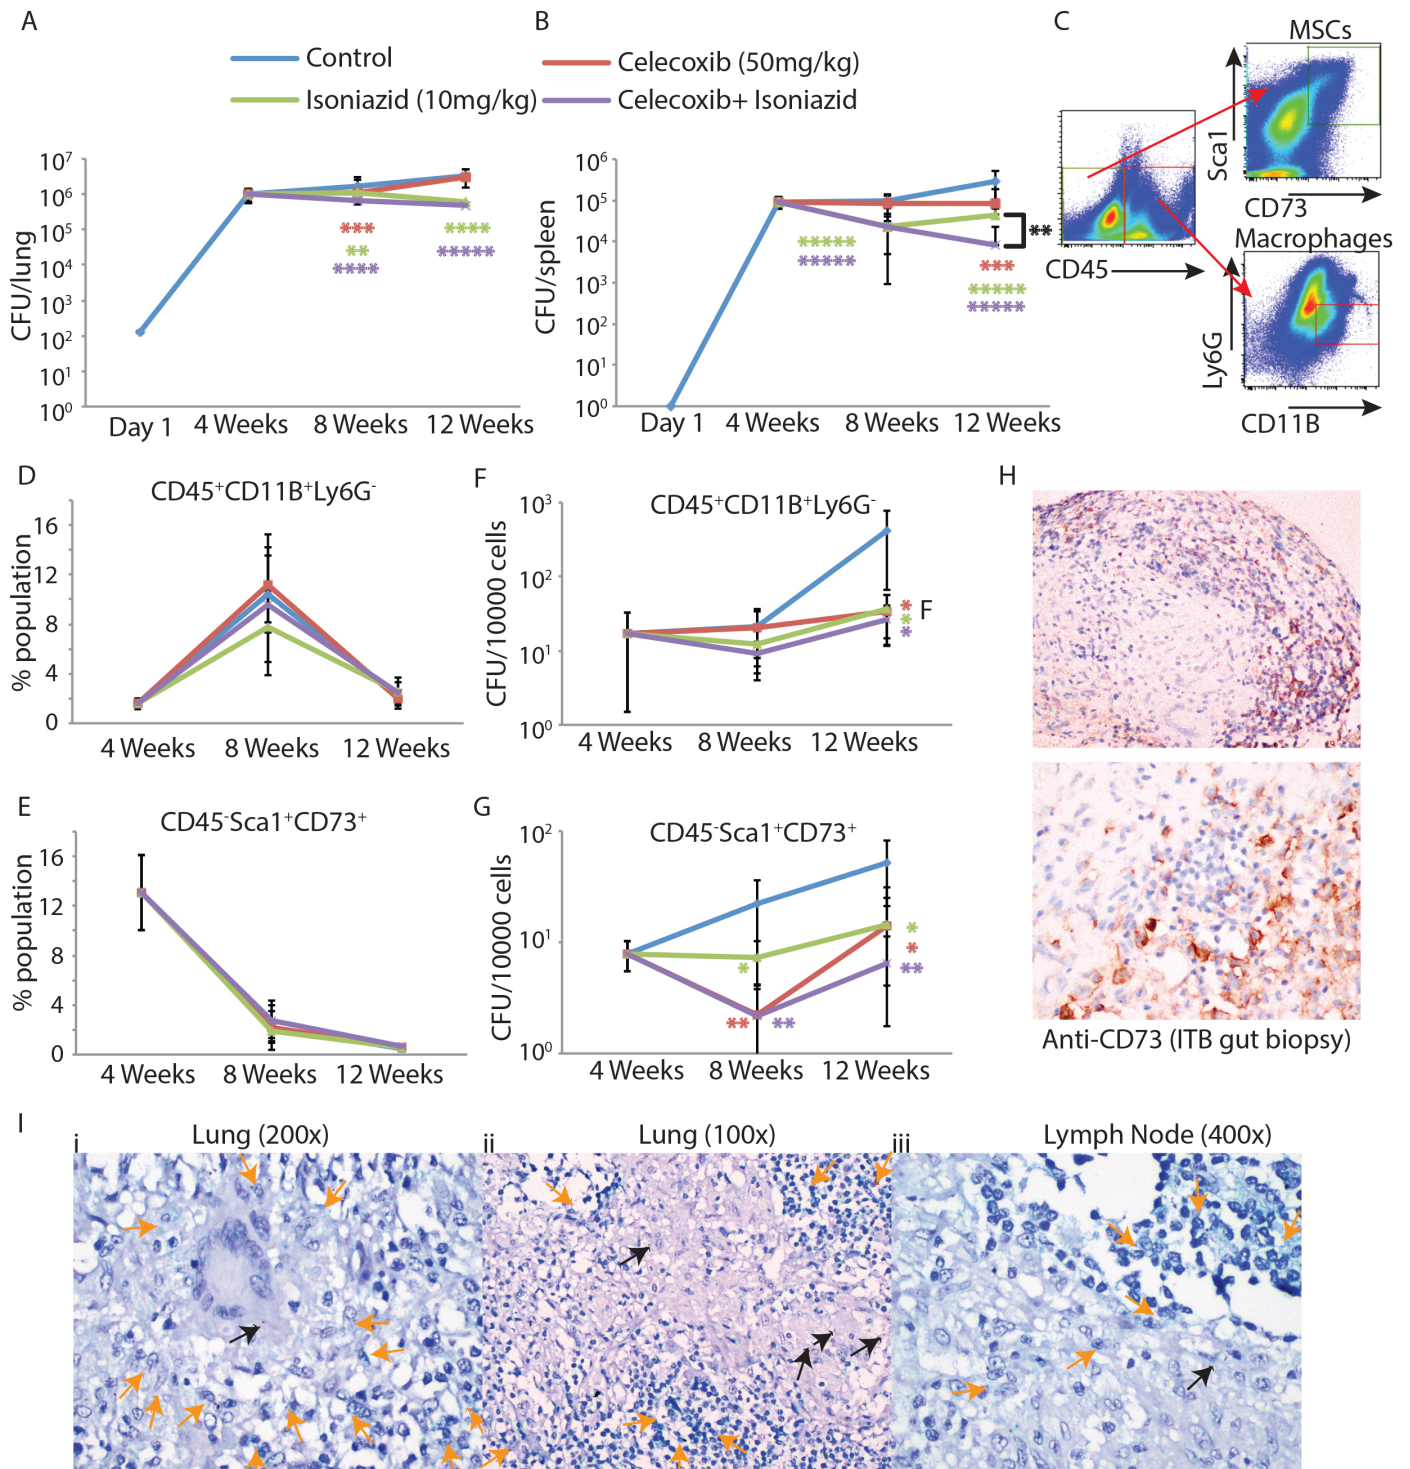

Source: https://www.biorxiv.org/content/10.1101/521609v1.full.pdf
